1           **High-Throughput, Single-Copy Sequencing Reveals SARS-CoV-2 Spike Variants**  
2                   **Coincident with Mounting Humoral Immunity during Acute COVID-19**

3  
4       Sung Hee Ko<sup>1,¶</sup>, Elham Bayat Mokhtari<sup>1,¶</sup>, Prakriti Mudvari<sup>1,¶</sup>, Sydney Stein<sup>2,3</sup>, Christopher D.  
5       Stringham<sup>1</sup>, Danielle Wagner<sup>1</sup>, Sabrina Ramelli<sup>2</sup>, Marcos J. Ramos-Benitez<sup>2,3</sup>, Jeffrey R. Strich<sup>2</sup>,  
6       Richard T. Davey, Jr.<sup>3</sup>, Tongqing Zhou<sup>1</sup>, John Misasi<sup>1</sup>, Peter D. Kwong<sup>1</sup>, Daniel S. Chertow<sup>2,3</sup>,  
7                                   Nancy J. Sullivan<sup>1</sup>, and Eli A. Boritz<sup>1,\*</sup>

8       <sup>1</sup>Vaccine Research Center, National Institute of Allergy and Infectious Diseases, National  
9       Institutes of Health, Bethesda, MD 20892, USA.

10       <sup>2</sup>Emerging Pathogens Section, Critical Care Medicine Department, National Institutes of Health  
11       Clinical Center, Bethesda, MD 20892, USA.

12       <sup>3</sup>Laboratory of Immunoregulation, Division of Intramural Research, National Institute of Allergy  
13       and Infectious Diseases, National Institutes of Health, Bethesda, MD 20892, USA.

14       <sup>¶</sup>These authors contributed equally to this work.

15       \*[boritze@mail.nih.gov](mailto:boritze@mail.nih.gov) (EAB)

16

17       Short Title: High-Throughput, Single-Copy Sequencing of SARS-CoV-2 *Ex Vivo*

18 **Abstract**

19 Tracking evolution of the severe acute respiratory syndrome coronavirus 2 (SARS-CoV-2)  
20 within infected individuals will help elucidate coronavirus disease 2019 (COVID-19)  
21 pathogenesis and inform use of antiviral interventions. In this study, we developed an approach  
22 for sequencing the region encoding the SARS-CoV-2 virion surface proteins from large numbers  
23 of individual virus RNA genomes per sample. We applied this approach to the WA-1 reference  
24 clinical isolate of SARS-CoV-2 passaged *in vitro* and to upper respiratory samples from 7 study  
25 participants with COVID-19. SARS-CoV-2 genomes from cell culture were diverse, including  
26 18 haplotypes with non-synonymous mutations clustered in the spike NH<sub>2</sub>-terminal domain  
27 (NTD) and furin cleavage site regions. By contrast, cross-sectional analysis of samples from  
28 participants with COVID-19 showed fewer virus variants, without structural clustering of  
29 mutations. However, longitudinal analysis in one individual revealed 4 virus haplotypes bearing  
30 3 independent mutations in a spike NTD epitope targeted by autologous antibodies. These  
31 mutations arose coincident with a 6.2-fold rise in serum binding to spike and a transient increase  
32 in virus burden. We conclude that SARS-CoV-2 exhibits a capacity for rapid genetic adaptation  
33 that becomes detectable *in vivo* with the onset of humoral immunity, with the potential to  
34 contribute to delayed virologic clearance in the acute setting.

## 35 **Author Summary**

36 Mutant sequences of severe acute respiratory syndrome coronavirus-2 (SARS-CoV-2) arising  
37 during any individual case of coronavirus disease 2019 (COVID-19) could theoretically enable  
38 the virus to evade immune responses or antiviral therapies that target the predominant infecting  
39 virus sequence. However, commonly used sequencing technologies are not optimally designed to  
40 detect variant virus sequences within each sample. To address this issue, we developed novel  
41 technology for sequencing large numbers of individual SARS-CoV-2 genomic RNA molecules  
42 across the region encoding the virus surface proteins. This technology revealed extensive genetic  
43 diversity in cultured viruses from a clinical isolate of SARS-CoV-2, but lower diversity in  
44 samples from 7 individuals with COVID-19. Importantly, concurrent analysis of paired serum  
45 samples in selected individuals revealed relatively low levels of antibody binding to the SARS-  
46 CoV-2 spike protein at the time of initial sequencing. With increased serum binding to spike  
47 protein, we detected multiple SARS-CoV-2 variants bearing independent mutations in a single  
48 epitope, as well as a transient increase in virus burden. These findings suggest that SARS-CoV-2  
49 replication creates sufficient virus genetic diversity to allow immune-mediated selection of  
50 variants within the time frame of acute COVID-19. Large-scale studies of SARS-CoV-2  
51 variation and specific immune responses will help define the contributions of intra-individual  
52 SARS-CoV-2 evolution to COVID-19 clinical outcomes and antiviral drug susceptibility.

## 53 **Introduction**

54 Although SARS-CoV-2 genetic diversification was initially slow as the virus spread around the  
55 world (1), the extent and implications of intra-individual virus evolution during COVID-19 are  
56 still being explored. Close genetic relationships among single-person SARS-CoV-2 consensus  
57 sequences do not rule out intra-individual evolution because virus burden and transmissibility  
58 peak shortly after acquisition (2-4), before the development of adaptive immune responses that  
59 could select transmissible virus variants. Furthermore, SARS-CoV-2 evolution has been detected  
60 in people with compromised immunity, with shifts in virus consensus sequences detected during  
61 prolonged shedding (5-9). In early infection, however, analysis of SARS-CoV-2 sequences has  
62 not routinely demonstrated directional genetic change. Sites in the virus genome showing  
63 significant intra-individual variation have been found in cross-sectional data (10-14), with one  
64 study linking the number of variant sites to disease severity at the time of study (15).  
65 Nonetheless, studies in clinically diverse cohorts have found that SARS-CoV-2 consensus  
66 sequences (16) and minor variants (14) remain stable in most people over time. These findings  
67 would suggest that immune responses against transmitted virus strains should continue to target  
68 replicating viruses throughout the course of each individual's infection.

69 An important obstacle to understanding intra-individual evolution of SARS-CoV-2 is that  
70 standard sequencing and analytical procedures yield a single consensus sequence for each sample,  
71 rather than multiple sequences representing virus quasispecies diversity. Standard procedures  
72 typically either amplify virus RNA in fragments spanning the genome or produce meta-  
73 transcriptome libraries of fragments from the entire sample (17), followed by short-read deep  
74 sequencing, read alignment or assembly, and virus genome consensus determination. These  
75 approaches readily cover nearly the entire 30-kilobase length of the SARS-CoV-2 genome for

76 samples from hundreds or thousands of people at a time, helping to define inter-individual virus  
77 variation on a global scale (1). However, combined amplification from multiple genomes and the  
78 “shotgun” sequencing of long regions in small fragments can both disrupt genetic linkage and  
79 prevent error correction at the level of individual haplotypes. Analysis of intra-individual  
80 variation within resulting data is thus largely limited to the detection of genome positions at  
81 which variation occurs at levels exceeding the background variation that invariably arises from  
82 sample amplification and sequencing errors. As a result, standard methods could miss important  
83 patterns of intra-individual SARS-CoV-2 diversity and evolution due to insufficient  
84 discrimination of true signal from technical noise.

85 In this report we use a single-genome amplification and sequencing (SGS) approach to  
86 investigate the genetic diversity of SARS-CoV-2 in samples from people with COVID-19. Our  
87 approach is conceptually similar to conventional SGS procedures, which amplify single  
88 molecules at limiting dilution for Sanger sequencing (18, 19). However, to obtain a broad view  
89 of the SARS-CoV-2 variant pool, we developed a high-throughput SGS (HT-SGS) strategy  
90 employing long-read deep sequencing of the surface protein gene region from large numbers of  
91 individual virus genomes. Our results demonstrate the emergence of SARS-CoV-2 genetic  
92 variants under host immune pressure during acute infection.

## 93 **Results**

### 94 **Validation of HT-SGS for SARS-CoV-2 Surface Protein Gene Sequencing**

95 We developed an HT-SGS approach for sequencing individual virus RNA genomes within each  
96 sample across the spike (S), ORF3, envelope (E), and membrane (M) protein genes. This  
97 approach employs unique molecular identifier (UMI) tags added to the virus genome  
98 complementary DNA (cDNA) during reverse transcription (Fig 1A and S1 Fig), and incorporates  
99 several layers of error correction in a custom bioinformatic pipeline (Fig 1A and S2 Fig). These  
100 include (i) consensus formation from reads with matching UMIs to remove PCR errors and those  
101 sequencing errors not addressed by circular consensus sequence (CCS) correction (20), (ii) initial  
102 removal of UMI bins with outlying low read counts by inflection point filtering (S2B Fig), (iii)  
103 network-based filtering to exclude false UMI bins arising from PCR or sequencing errors in the  
104 UMI (see Materials and Methods), and (iv) stringent removal of UMI bins with low read counts  
105 by knee point filtering (S2C Fig). Reverse transcription error is then addressed by (v) flagging  
106 unique and potentially spurious insertions/deletions (indels) and other rare mutations by variant  
107 calling, for reversion to the sample consensus, and (vi) exclusion of sequence haplotypes  
108 occurring in only 1 UMI bin (i.e., unique SGS).

109 To validate our method, we applied it to clonal RNA transcripts representing the USA/WA-1  
110 sequence (wt) or a double-mutant (2M) sequence that included two scrambled 20-base sections  
111 at the ends of the target region (Fig 1B). Using UMI bin consensus sequences obtained after knee  
112 point filtering, we calculated error rates of 0.00024/base for the wt target and 0.00025/base for  
113 the 2M target. No inter-template recombinants were detected. Putative errors included both  
114 single-nucleotide substitutions and short indels, and likely represented a combination of reverse  
115 transcription, PCR, sequencing errors as well as *in vitro* transcription errors and plasmid

116 mutations. After a completed analysis including variant calling, rare mutation reversion, and  
117 exclusion of unique SGS, we found that all remaining sequences exactly matched their  
118 corresponding references, with quantitative recovery of the two targets from a dilution series  
119 (Table I). These results support the high accuracy of our data generation and analytical approach.

120 Table I. Detection of input clonal sequences and recombinants in HT-SGS validation  
121 experiments.

| Input<br>wt:2M ratio | Count (%) of single-genome consensus seqs detected |            |             |
|----------------------|----------------------------------------------------|------------|-------------|
|                      | wt                                                 | 2M         | Recombinant |
| wt only              | 84 (100)                                           | 0          | 0           |
| 2M only              | 0                                                  | 162 (100)  | 0           |
| 1:1                  | 52 (37.7)                                          | 86 (62.3)  | 0           |
| 1:5                  | 24 (13.6)                                          | 153 (86.4) | 0           |
| 5:1                  | 89 (84.8)                                          | 16 (15.2)  | 0           |
| 1:50                 | 2 (1.2)                                            | 162 (98.8) | 0           |
| 50:1                 | 128 (97.7)                                         | 3 (2.3)    | 0           |

122

### 123 **HT-SGS Analysis of a Cultured Clinical Isolate of SARS-CoV-2**

124 To begin evaluating intra-sample diversity of SARS-CoV-2, we applied our HT-SGS process to  
125 a 4<sup>th</sup>-passage Vero cell culture of the WA-1 reference clinical isolate. As shown in Figure 2A,  
126 the consensus of all HT-SGS sequences from this sample exactly matched the WA-1 reference  
127 sequence, consistent with the high accuracy of the method. However, data analysis at the single-  
128 genome level revealed 18 unique SARS-CoV-2 haplotypes detected in between 3 and 174  
129 individual virus genomes per haplotype, with each single-genome consensus supported by >500  
130 sequence reads (Fig 2A-B). More than half (57.6%) of all SGS differed from the reference  
131 consensus sequence at one or more nucleotide positions (Fig 2A). All 17 mutations detected in

132 variant virus genomes were non-synonymous, suggesting selective pressure on the virus.  
133 Structurally, mutations were clustered almost exclusively in the spike NTD and furin cleavage  
134 site regions. The NTD mutations included 9 distinct single-nucleotide variants (SNVs) and 2  
135 distinct insertions that added positively-charged or removed negatively-charged amino acid  
136 residues at the NTD outer surface (Fig 2A and 2C), consistent with observed selection patterns in  
137 other virus envelope proteins during cell culture adaptation (21, 22). Mutations in the area of the  
138 furin cleavage site included 3 SNVs and one deletion of 12 amino acids (Fig 2A and 2C), and  
139 were consistent with mutations observed in this region after *in vitro* passage in other studies (23).  
140 The remaining 2 mutations encoded a T307I substitution in spike, linked with R682L at the furin  
141 cleavage site, and a T7I substitution in the M gene found both in isolation and linked with 2  
142 different spike NTD mutations (Fig 2A). Overall, these results demonstrated that SARS-CoV-2  
143 can accumulate considerable genetic diversity, as revealed by analysis of HT-SGS data at the  
144 single-genome level.

#### 145 **HT-SGS Performance in Direct *Ex Vivo* Sequencing of SARS-CoV-2**

146 We anticipated that, compared to high-quality RNA preparations from cultured virus, human  
147 respiratory samples would contain variable levels of intact SARS-CoV-2 genomes, and that  
148 contaminants and inhibitors of steps in the HT-SGS process might also be present. We therefore  
149 evaluated the performance of HT-SGS using upper respiratory samples from 7 people with  
150 COVID-19 (S1 Table). Using droplet-digital reverse-transcription PCR (ddRT-PCR) to quantify  
151 two regions within the SARS-CoV-2 N gene, we detected virus loads in these samples ranging  
152 from 314 to >3 million RNA copies/mL. By comparison, our recovery of cDNA encompassing  
153 the S, E, and M gene region in HT-SGS was considerably lower (Table II). This discrepancy was  
154 consistent with multiple differences between the two measurements, including the presence of



155 subgenomic RNAs containing ddRT-PCR target but lacking intact HT-SGS target sequences;  
156 lower efficiency of cDNA synthesis across our 6.1-kilobase HT-SGS target region than across  
157 short ddRT-PCR targets; and some degree of RNA degradation preferentially affecting HT-SGS.  
158 Similarly, yields of single-genome consensus sequences recovered by HT-SGS ranged from 8.8%  
159 to 26.0% of input cDNA copy numbers (Table II), likely due to a combination of cDNA  
160 degradation and loss; failure of some cDNA molecules to amplify during PCR; and highly  
161 stringent read count cutoffs that we employed in the bioinformatic analysis in an effort to ensure  
162 accuracy of all reported sequences. Despite these considerations, however, yields at each step of  
163 the process were correlated with sample virus loads (S3 Fig), with recovery of between 12 and  
164 1,276 single-genome consensus sequences for the samples studied (Table II). Moreover,  
165 although we sequenced these samples to a high depth (7,499-462,919 raw reads/sample), we  
166 observed that detection of distinct virus haplotypes was highly reproducible in random  
167 subsamples down to a level of 5% (S4 Fig). This indicates that multiple samples can be  
168 combined in individual HT-SGS sequencing runs while still achieving sufficient depth to detect  
169 minor variant sequences.

170

171 Table II. Virus loads and recoveries of cDNA and final SGS in HT-SGS from upper respiratory  
172 swab samples.

| Sample      | N1 RNA (copies/mL) | N2 RNA (copies/mL) | cDNA copies recovered <sup>a</sup> | Input cDNA copies (SGS) | SGS recovered | SGS % recovery |
|-------------|--------------------|--------------------|------------------------------------|-------------------------|---------------|----------------|
| Pt.1 (d9)   | 3,069,099          | 2,832,963          | 24,233                             | 8,220                   | 1,276         | 15.5           |
| Pt.1 (d11)  | nd                 |                    | 19,576                             | 10,000                  | 882           | 8.8            |
| Pt.1 (d13)  | 314                | 386                | 124                                | 124                     | 16            | 12.9           |
| Pt.1 (d15)  | 13,470             | 11,105             | 1,807                              | 1,807                   | 284           | 15.7           |
| Pt.1 (d17)  | 3,774              | 2,919              | 70                                 | 70                      | 12            | 17.2           |
| Pt. 2 (d12) | 116,508            | 108,586            | 536                                | 536                     | 70            | 13.1           |
| Pt.3 (d17)  | nd                 |                    | 17,531                             | 10,000                  | 1,210         | 12.1           |
| Pt. 4 (d8)  | 872,984            | 841,366            | 605                                | 605                     | 108           | 17.9           |
| Pt. 5 (d8)  | 2,669,500          | 2,520,722          | 4,060                              | 3,400                   | 367           | 10.8           |
| Pt. 6 (d8)  | 105,735            | 92,156             | 255                                | 255                     | 31            | 12.2           |
| Pt. 7 (d16) | 101,327            | 96,916             | 50                                 | 50                      | 13            | 26.0           |

173 <sup>a</sup>Sample volumes used for extraction were 140  $\mu$ L ~ 300  $\mu$ L.

174 **Cross-sectional analysis of SARS-CoV-2 diversity and humoral immunity during acute**  
175 **COVID-19**

176 Because the mutations we detected in cultured virus resembled those described for SARS-CoV-2  
177 and other viruses during culture adaptation, we interpreted the extensive diversity observed as  
178 evidence of virus diversification *in vitro* rather than in the source patient. We therefore analyzed  
179 the diversity of HT-SGS sequences obtained from the 7 study participants in S1 Table. In  
180 samples taken between 8 and 17 days since the onset of clinical illness (each representing the  
181 earliest available sample for the individual), we detected only a single virus haplotype in  
182 participants 1, 2, and 6 (range of SGS counts, 31-1276/participant) and 2-3 haplotypes in each of  
183 the remaining 4 participants (range of SGS counts, 13-1210/participant; Fig 3). In addition, we  
184 noted no clear structural signature among the 7 mutations that defined intra-individual variant  
185 haplotypes, with 1 SNV in the downstream region of the spike gene, 4 SNVs in the non-  
186 structural ORF3 and ORF6 genes, and 2 synonymous SNVs (Fig 3). Overall, therefore, cross-

187 sectional HT-SGS analysis of SARS-CoV-2 sequences in 7 individuals was notable for relative  
188 sequence homogeneity, as compared to results from cultured virus.

189 To reconcile the extensive diversity among SARS-CoV-2 genomes *in vitro* with the lesser  
190 diversity detected in *ex vivo* samples, we hypothesized a relationship between virus diversity and  
191 host antibody responses arising after the establishment of infection. To investigate this, we used  
192 biolayer interferometry (BLI) to analyze antibody profiles in participants from whom  
193 longitudinal serum samples were available (i.e., participants 1 and 3). In these individuals, we  
194 observed a marked rise in autologous serum binding to spike protein between the earliest  
195 available timepoint (participant 1, day 9 and participant 3, day 17) and later timepoints  
196 (participant 1, days 16 and 19 and participant 3, day 27; Fig 4). The increase in total serum  
197 binding to spike was 6.2-fold between days 12 and 16 in participant 1 and 5.75-fold between  
198 days 17 and 27 in participant 3. Using monoclonal antibody (mAb) competition to map domain-  
199 specific responses, we detected serum binding to NTD, receptor-binding domain (RBD), and S2  
200 domain in both participants (Fig 4). We also observed a continued increase in serum binding not  
201 competed by any tested mAb panel in participant 1 (Fig 4A, days 16 and 19, grey bars),  
202 suggesting progressive broadening of the binding response. Taken together, these findings  
203 indicated that samples with low levels of SARS-CoV-2 variation had been taken before full  
204 development of circulating antibody responses to the virus spike.

### 205 **Intra-individual SARS-CoV-2 evolution during acute infection**

206 We next investigated the relationship between mounting spike-directed antibody responses and  
207 the levels and sequences of SARS-CoV-2 RNA in respiratory secretions from participant 1. We  
208 found that the burden of SARS-CoV-2 RNA declined substantially but irregularly between days  
209 9 and 17 (Fig 5A). Between days 9 and 13, virus RNA declined by nearly 4 orders of magnitude,

210 from  $2.83 \times 10^6$  (N2) –  $3.0 \times 10^6$  (N1) copies/mL to  $3.14 \times 10^2$  (N1) –  $3.86 \times 10^2$  (N2) copies/mL.  
211 However, virus RNA subsequently increased to  $1.11 \times 10^4$  (N2) –  $1.35 \times 10^4$  (N1) copies/mL on  
212 day 15, before declining again on day 17. This pattern was associated with the emergence of 2  
213 minor variant SARS-CoV-2 haplotypes on day 11 and 4 minor variant haplotypes on day 15 (Fig  
214 5B). Strikingly, these variants together bore 3 independent non-synonymous mutations within a  
215 single NTD epitope. On day 11, a C-to-T transition causing an H-to-Y change at amino acid  
216 residue 146 was found in 10/882 (1.1%) genomes sequenced. After a low virus RNA burden on  
217 day 13 with detection of only the consensus virus variant, sequencing on day 15 revealed  
218 deletions of either residues 141-144LGVY or residue 144Y alone. These mutations were found  
219 in 3 different haplotypes that accounted for 70/284 (26.1%) genomes sequenced on day 15 (Fig  
220 5B, bar graph). Structural modeling onto the spike trimer (Fig 5C) indicated that these mutations  
221 were located in a supersite of vulnerability targeted by potent neutralizing antibody 4A8 (24),  
222 where similar mutations have been observed in case reports of persistent infections (5, 6) and a  
223 larger study of recurrently deleted regions (9). Therefore, we performed additional serum  
224 antibody mapping studies with this mAb and found that before the NTD mutations had emerged  
225 in autologous viruses, autologous serum antibodies against NTD predominantly recognized the  
226 4A8 epitope (Fig 5D). Taken together, these results demonstrated a close temporal relationship  
227 between the development of SARS-CoV-2 spike NTD-specific antibodies in serum, the  
228 independent emergence of multiple mutations in a region of the NTD targeted by these  
229 antibodies, and a transient delay in virus clearance.

## 230 **Discussion**

231 Here we developed and validated a novel method that accurately sequences the 6.1-kilobase  
232 SARS-CoV-2 surface protein gene region from large numbers of individual virus genomes.  
233 Using this method, we analyzed virus genetic diversity both *in vitro* and in respiratory secretions  
234 from people with COVID-19. In contrast to *in vitro* passaged viruses, which exhibited extensive  
235 diversity fitting patterns associated with culture adaptation (21-23), we initially found relatively  
236 low intra-individual SARS-CoV-2 diversity *ex vivo*. These results appeared consistent with the  
237 slow evolution among worldwide virus sequences during the early months of the pandemic (1).  
238 Nevertheless, our relatively homogeneous cross-sectional sequencing findings in people with  
239 COVID-19 were not due entirely to intrinsic limitations on SARS-CoV-2 diversity. Instead,  
240 longitudinal analysis during the second and early third weeks of illness in one person revealed a  
241 transient increase in virus burden and multiple new virus variants in which 3 different mutations  
242 in an epitope of the spike NTD had arisen independently. The mutated epitope was previously  
243 shown to be a neutralizing antibody target (24), and was identified herein as a major target for  
244 antibodies in the autologous serum. Our results therefore suggest selection of SARS-CoV-2  
245 spike variants by mounting antibody responses in the acute setting.

246 Mutational evasion of adaptive immune responses by SARS-CoV-2 during acute COVID-19 has  
247 not been clearly documented previously. This relationship may have been overlooked in part due  
248 to the emphasis on tracking new mutations on a global scale, with a predominance of cross-  
249 sectional rather than longitudinal analyses of infected individuals. The early peak of SARS-CoV-  
250 2 RNA in respiratory secretions may also favor high-quality data acquisition in very early  
251 infection, leading to overrepresentation of individuals in whom virus populations have not yet  
252 been subjected to adaptive immune pressure. Another important consideration is the sequencing

253 method used. Our method was specifically developed for high-throughput analysis of single  
254 virus RNA molecules, and incorporates several layers of error correction that aid in  
255 distinguishing true variation from technical errors. This allowed groups of important virus  
256 variants to be detected even though each variant individually accounted for a small proportion of  
257 all sequences in each sample. Finally, we cannot rule out that our distinctive findings might  
258 relate to our longitudinal study participant's history of stem cell transplantation. It is possible  
259 that immune suppression can lead to higher levels of virus replication and thus an unusually  
260 rapid accumulation of "total-body" virus diversity *in vivo*. However, we noted that our  
261 longitudinal participant was no longer receiving immune suppressive medication at the time of  
262 COVID-19 diagnosis, and measurements of virus burden in respiratory secretions were  
263 consistent with previous studies in immunocompetent participants (25, 26). Wider application of  
264 our combined virological and immunological approach in diverse clinical cohorts will aid in  
265 defining circumstances under which SARS-CoV-2 genetic variants may emerge under immune-  
266 mediated pressure.

267 Tracking intra-individual virus evolution is of great interest in understanding SARS-CoV-2  
268 pathogenesis and treatment. As our longitudinal study participant recovered clinically, spike  
269 variants detected by HT-SGS were replaced by unmutated sequences even though the variant  
270 sequences might have avoided neutralization by 4A8-like antibodies *in vivo*. This was likely due  
271 to a broadly-targeted antiviral response, including innate defenses, antiviral T cells, and multiple  
272 antibody specificities, each potentially with distinct kinetics during the transition from acute  
273 infection to convalescence. The absence of spike RBD variants in our longitudinal sequencing  
274 despite strong RBD-directed serum binding suggests limitations on SARS-CoV-2 escape from  
275 polyclonal responses, perhaps especially in genome regions less tolerant of indel mutations (9).

276 Nevertheless, recent findings made with spike variants from second wave pandemic spread  
277 demonstrate that SARS-CoV-2 can sometimes overcome genetic barriers to broader immune  
278 escape (27-30). At the same time, the diversity of clinical outcomes in COVID-19 may relate in  
279 part to control of the virus, with slower virologic clearance linked to disease severity (25, 31-33).  
280 It will be important to examine whether this reflects a “tipping point” in early infection at which  
281 SARS-CoV-2 genetic diversity can occasionally allow sustained replication through the evasion  
282 of immune recognition. Immunity induced by prior infection, vaccination, or passive  
283 immunization could reduce the potential for escape by controlling initial levels of virus  
284 replication quickly. Our results also emphasize that early antiviral therapy or combinations of  
285 antivirals with distinct targets could have markedly higher virologic efficacy than monotherapy  
286 administered later in the disease course.

## 287 **Materials and Methods**

### 288 Ethics Statement

289 Individuals admitted as hospital inpatients at the U.S. National Institutes of Health (NIH)  
290 Clinical Center who had positive tests for SARS-CoV-2 were enrolled consecutively for  
291 combined virological and immunological analysis during the period of March-May 2020 (S1  
292 Table). Study participants were recruited in compliance with relevant ethical regulations and  
293 provided informed consent under protocols approved by the NIH Institutional Review Board.

### 294 Samples

295 Plasmid DNA for validation experiments was generated by BioInnovatise, Inc. (Rockville, MD)  
296 to include the WA-1 sequence (GenBank – MN985325) of the 6.3-kilobase region containing the  
297 S, ORF3, E and M genes, inserted into the pSI vector (Promega). A double-mutant plasmid was  
298 then created by using site-directed mutagenesis to scramble 20 bases each at the 5' and 3' ends  
299 of the target (genome position 21,583 – ATTGCCACTAGTCTCTAGTC →  
300 CCCTAATTGTTGAATCGCCT and genome position 27,169 –  
301 ATATTGCTTTGCTTGTACAG → TCTGGTTGAGCTACTATTTA; Fig 1B). To prepare  
302 clonal RNA samples representing these two sequences, plasmids were linearized by digestion  
303 with AatII (FD0994, ThermoFisher Scientific) and *in vitro* transcribed using the MegaScript™  
304 T7 Transcription Kit (AMB1334, ThermoFisher Scientific). Reactions were incubated at 4°C for  
305 20 hr to minimize incomplete transcripts (34). Plasmid DNA was then removed using the  
306 TURBO™ DNA-free kit (AM1907, ThermoFisher Scientific), and RNA was recovered by  
307 lithium chloride precipitation. The RNA was quantified on a Qubit Fluorometer and Quant-iT™  
308 RNA assay kit (Q10213, Thermofisher Scientific) and analyzed by electrophoresis with E-Gel  
309 EX™ Agarose Gels 1 % (G401001, Thermofisher Scientific).



310 Extracted RNA from the 4<sup>th</sup> Vero cell passage of the SARS-CoV-2 WA-1 clinical isolate was  
311 obtained from the BEI Resource (catalog #NR-52285). Nasopharyngeal or oropharyngeal swabs  
312 from study participants were collected in viral transport medium and cryopreserved until  
313 processing for HT-SGS or SARS-CoV-2 RNA quantification.

#### 314 SARS-CoV-2 RNA quantification

315 Total RNA was extracted from oropharyngeal and nasopharyngeal swab specimens using the  
316 QIAamp Viral RNA Mini Kit (Qiagen, Germantown, MD, USA) according to the  
317 manufacturer's protocols. The QX200 AutoDG Droplet Digital PCR System (Bio-Rad, Hercules,  
318 CA, USA) was used to detect and quantify SARS-CoV-2 RNA using the SARS-CoV-2 Droplet  
319 Digital PCR Kit (Bio-Rad), which contains a triplex assay of primers/probes aligned to the CDC  
320 markers for SARS-CoV-2 N1 and N2 genes and human RPP30 gene. 96-well plates were  
321 prepared with technical replicates containing 5.5  $\mu$ L RNA per well. Microdroplet generation was  
322 performed on the QX200 Automated Droplet Generator (Bio-Rad), and plates were sealed with  
323 the PX1 PCR Plate Sealer (Bio-Rad) before proceeding with RT-PCR on the C1000 Touch  
324 Thermal Cycler (Bio-Rad) according to the manufacturer's instructions. Plates were read on the  
325 QX200 Droplet Reader (Bio-Rad) and analyzed using the freely available QuantaSoft Analysis  
326 Pro Software (Bio-Rad) to quantify copies of N1, N2, and RP genes per well, which was then  
327 normalized to mL of sample input.

#### 328 HT-SGS Sample Preparation and Sequencing

329 Nasopharyngeal or oropharyngeal swab fluids were thawed and centrifuged at 1,150 x g for 15  
330 min at room temperature to pellet cells and debris. Supernatants were transferred to separate  
331 tubes, and supernatant and pellet fractions were processed in parallel, although SGS derived

332 from these two fractions were subsequently found to be similar and were thus pooled for each  
333 sample in the final analysis. Nucleic acids were extracted from supernatants and pellets using the  
334 QIAamp Viral RNA Mini Kit (52906, Qiagen) according to the manufacturer's instructions.

335 Sample RNA was reverse transcribed with SuperScript<sup>TM</sup> IV Reverse Transcriptase (18090010,  
336 ThermoFisher Scientific) using a reverse transcription (RT) primer binding within the SARS-  
337 CoV-2 ORF6 gene (TCTCCATTGGTTGCTCTTCATCT, WA-1 reference positions 27,357-  
338 27,379). The RT primer also included an 8-base UMI (NNNNNNNN) and an outer reverse  
339 primer binding site for PCR amplification (CCGCTCCGTCGACGACTCACTATA; see S1 Fig  
340 and S1 Table). Virus cDNA was treated with proteinase K for 25 min at 55°C with continuous  
341 shaking to remove residual protein (35), followed by purification with a 2.2:1 volumetric ratio of  
342 RNAClean XP solid phase reverse immobilization (SPRI) beads (A63987, Beckman Coulter).

343 Copy numbers of resulting cDNAs were determined by limiting-dilution PCR using  
344 fluorescence-assisted clonal amplification (FCA) (36) and a gene-specific primer pair detecting a  
345 region upstream of the S gene (S2 Table). Subsequently, cDNA molecules were amplified using  
346 the Advantage 2 PCR kit (639206, Takara Bio) with initial denaturation at 95 °C for 1 min,  
347 followed by 30 cycles of denaturation at 95 °C for 10 sec, annealing at 64 °C for 30 sec, and  
348 extension at 68 °C for 7 min, followed by one final extension at 68 °C for 10 min. Each PCR  
349 reaction was run in a 20 µL volume with final primer concentration of 400 nM. Primers included  
350 the outer reverse primer and one of two different forward primers (S2 Table). Amplified DNA  
351 was quantified on a Qubit Fluorometer (Thermofisher Scientific) and analyzed by  
352 electrophoresis with precast 1% agarose gel (Embi Tec) or the Agilent High Sensitivity DNA kit  
353 (5067-4626, Agilent). Amplified DNA products spanning the 6.1-kilobase virion surface protein  
354 gene region of SARS-CoV-2 with single-genome UMI-based tagging were incorporated into

355 sequencing libraries using the SMRTbell Express Template Prep Kit 2.0 (100-938-900, Pacific  
356 Biosciences) and Barcoded Overhang Adapters (101-629-000, Pacific Biosciences) to enable  
357 sample multiplexing. Libraries were prepared for sequencing by primer annealing and  
358 polymerase binding using the Sequel II Binding Kit 2.0 and Int Ctrl 1.0 (101-842-900, Pacific  
359 Biosciences), and were sequenced by single-molecule, real-time (SMRT) sequencing using a  
360 Sequel II system 2.0 (Pacific Biosciences) with a 30-hour movie time under circular consensus  
361 sequencing (CCS) mode.

### 362 HT-SGS Initial Data Processing

363 Circular consensus sequences (CCS) were generated from SMRT sequencing data with  
364 minimum predicted accuracy of 0.99 and minimum number of passes of 3 in Pacific Biosciences  
365 SMRT Link (v8.0) using Arrow modeling framework (37). CCS reads were then demultiplexed  
366 using Pacific Biosciences barcode demultiplexer (lima) to identify barcode sequences. The  
367 resulting FASTA files were reoriented into 5'-3' direction using the *usearch -orient* command in  
368 USEARCH (v8.1.1861) (38). Cutadapt (v2.7) (39) was used to trim forward and reverse primers.  
369 Length filtering was performed to remove reads shorter than 90% or longer than 130% of the  
370 reference sequence length. Appropriately-sized reads were then binned using 8-base UMI  
371 sequences. The read count in each UMI bin was plotted against the rank of that UMI bin (on log  
372 scale) within the sample, and the inflection point (i.e., point of concavity change) was calculated  
373 (S2B Fig). UMI bins with read counts less than the inflection point were discarded, leaving UMI  
374 bins with higher counts. Cutadapt (v2.7) was used to remove the RT primer and UMI sequences  
375 from each UMI bin consensus to obtain the SARS-CoV-2 insert sequence for that bin. Consensus  
376 sequences were generated for each bin using the *usearch-cluster\_fast* command based on 99%  
377 identity to obtain high-confidence single-molecule sequences. Consensus sequences were then

378 analyzed by searching the BLAST nt database, and non-coronavirus sequences thus identified  
379 were discarded.

### 380 Determining SGS in HT-SGS Data

381 The probability that two independent UMI sequences differ by a single nucleotide substitution  
382 (i.e., have an edit distance of 1 base) can be estimated using binomial distribution with  
383 parameters  $n = 8$  and  $p = 0.75$ , where  $n$  is the number of independent UMI bases and  $p$  is the  
384 probability that a base differs between two UMIs. Therefore, the probability of any two  
385 independent UMIs having edit distance one is  $B(8, .75, 1) = 3.6E - 4$ . Hence, it is appropriate  
386 to assume that two UMI sequences having edit distance 1 could represent a scenario where one  
387 of the UMIs is derived from the other through PCR and/or sequencing error. To identify and  
388 remove potential false UMI bins, we utilized a UMI network method (40). In this network, each  
389 UMI sequence is represented by a node. Given two distinct nodes  $a$  and  $b$  with read counts  $n_a$   
390 and  $n_b$ , respectively (assume  $n_a \geq n_b$ ),  $a$  and  $b$  are connected by an edge if they have edit  
391 distance 1 and satisfy the following count criterion:  $n_a \geq 2n_b - 1$ . To resolve the network  
392 formed above, we applied the *adjacency* method (40). According to this method, the node with  
393 the largest count was selected and all connected nodes were removed. Next, the node with the  
394 second largest count was selected and all connected nodes were removed. This process was  
395 repeated until no more edges remained in the network. The *adjacency* method allowed resolution  
396 of a complex network to a single node. To further reduce the likelihood of including false UMI  
397 bins in downstream analysis, we combined our network adjacency approach with a “knee point”  
398 (the point of maximum curvature) filter (S2C Fig) to ensure that UMIs with large total counts  
399 were preserved. Inflection and knee points can both be considered as separations between the  
400 high and low count UMI bins, and both depend on the shape of the count distribution. The knee

401 point is more conservative in comparison to the inflection point. We used the knee rather than  
402 the inflection point at this stage in order to provide a more stringent threshold for removing false  
403 bins. To identify virus haplotypes defined by the data, we took the consensus sequences of all  
404 UMI bins and collapsed non-unique sequences. We considered the unique sequences bearing  
405 different combination of mutations as individual haplotypes. Finally, we manually inspected  
406 alignments of remaining UMI bin consensus sequences and removed any sequence that  
407 represented a SARS-CoV-2 haplotype observed in only one UMI bin for the sample in which it  
408 was found.

#### 409 UMI Collision Estimates

410 We investigated the possibility of UMI collision (two distinct molecules labeled with the same  
411 UMI) based on the assumption of uniformly distributed UMIs. As described by Fu et al. (41), the  
412 expected number of unique UMIs captured is  $k = m[1 - e^{-n/m}]$ , where  $n$  is the number of  
413 molecules and  $m$  is the size of UMI pool. Therefore,  $n = -m \ln(1 - \frac{k}{m})$ . Given the number of  
414 observed unique UMIs in a particular sample and UMI pool of size  $4^8 \approx 65000$ , we estimated  
415 the number of molecules and calculated the number of UMI collisions,  $(n-k)$ , for each sample.  
416 This number was observed to be small, and the probability of collision in each sample was at  
417 most 4%, with an average 1.8% across all samples. We also note that, in the event of a UMI  
418 collision between two distinct sequences, the clustering and consensus formation for each UMI  
419 bin described above and in S2 Fig results in preservation of the sequence cluster with higher read  
420 abundance and removal of the sequence cluster with lower read abundance.

#### 421 Variant Calling

422 Despite high single molecule read accuracy (>99.9%) of Pacific Bioscience HiFi reads, some  
423 sequencing errors – particularly small insertions and deletions – may persist in the reads after  
424 applying CCS read correction. These errors and those that may arise during RNA reverse  
425 transcription may not be identified by our extensive UMI-based error correction method. To  
426 distinguish such errors from real biological variation, we used ‘Map Long reads to reference’  
427 tool in ‘Long read support’ plugin in the CLC Genomics Workbench v.20.0.4 (GWB) with  
428 default settings. This tool utilizes Minimap2 to map long reads (42). We used the WA-1  
429 reference sequence (GenBank accession: MN985325.1) as a reference during mapping. We  
430 employed the Low Frequency variant caller in the GWB with the following settings:

431 *Ignore broken pairs= None*  
432 *Minimum coverage = 5*  
433 *Minimum count = 4*  
434 *Minimum frequency (%) = 0.0*

435  
436 We also applied a filtering criterion to remove variants in homopolymer regions with minimum  
437 length of 2 and a frequency less than or equal to 20%. We did not consider quality or direction  
438 and position filters typically used in analyzing paired-end, short-read data as these do not apply  
439 to long-read amplicon sequencing. We then manually inspected the mutation list to remove  
440 presumptive artifacts that were missed by the variant callers. The positions identified in our high-  
441 confidence variants list were then masked in the read mapping and bases in all other positions  
442 were reverted to the reference base, where applicable, using an in-house python script.

443 Analysis of Serum Antibody Binding to SARS-CoV-2 Spike Protein

444 Domain-specific antibody competition assays using a His-tagged SARS-CoV-2 Spike protein  
445 ectodomain containing 2 proline stabilization mutations (S-2P) (43) were performed using a  
446 fortéBio Octet HTX instrument and His1K (anti-penta His) biosensors at 30°C with agitation set  
447 to 1,000 rpm. Biosensors were first equilibrated for 600 seconds in PBS supplemented with 1%  
448 BSA, 0.01% Tween-20, and 0.02% sodium azide (PBS-BSA). Purified S-2P (10 µg/mL in PBS-  
449 BSA) was immobilized on equilibrated His1K sensors for 600 s. S-2P protein loading onto to the  
450 sensors was between 0.9 and 1.3 nm shift. Following S-2P immobilization, biosensors were  
451 equilibrated in PBS-BSA for 60 s. S-2P coated biosensors were submerged in either S-2P  
452 binding-domain specific competitor monoclonal antibodies (mAb) or negative control antibody,  
453 each at 10 µg/mL in PBS-BSA, for 600 s. At 600 s, the binding of all S-2P binding antibodies  
454 was saturating. Competitor mAbs were divided into three separate groups, each targeting a  
455 binding domain of S-2P: RBD, NTD, and S2 domain. Monoclonal antibodies included were  
456 composed of human IgG RBD-specific antibodies LY-CoV-555 (44), S309 (45), CR3022 (46),  
457 and CB6 (47), NTD-specific antibodies S652-118 (48), 4-8 (49) and 4A8 (24) and S2-specific  
458 antibody S652-112 (48). Following saturating competitor mAb association, biosensors were  
459 equilibrated in PBS-BSA for 60 s and then submerged in serum samples diluted 100-fold in  
460 PBS-BSA for 3600 s. Raw sensorgrams datapoints were aligned to Y (nm) = 0 in at the  
461 beginning of the second association phase. Competition and serum shift were analyzed when the  
462 serum samples reached saturation (4001.2 s). Pie charts depict each binding domain's relative  
463 contribution to the overall serum antibody binding to S-2P, as determined by percent  
464 competition. Percent competition (% C) of serum antibody binding to S-2P by competitor mAb  
465 groups was calculated using the following formula: % C = [1 - (shift nm value at 4001.2 s in

466 presence of competitor mAb)/(shift nm value at 4001.2 s in presence of negative control  
467 antibody)]\*100. All assays were performed in duplicate.



468 **Acknowledgments**

469 We gratefully acknowledge the participants in this study and thank the Vaccine Research Center  
470 Genome Analysis Core for sequencer access.

471

472 **Author Contributions**

473 **Conceptualization:** Sung Hee Ko, Elham Bayat Mokhtari, Prakriti Mudvari, Eli A. Boritz.

474 **Formal analysis:** Elham Bayat Mokhtari, Prakriti Mudvari.

475 **Funding acquisition:** Peter D. Kwong, Daniel S. Chertow, Nancy J. Sullivan, Eli A. Boritz.

476 **Investigation:** Sung Hee Ko, Elham Bayat Mokhtari, Prakriti Mudvari, Sydney Stein,  
477 Christopher D. Stringham, Danielle Wagner, Sabrina Ramelli, Marcos J. Ramos-Benitez,  
478 Tongqing Zhou, John Misasi.

479 **Resources:** Jeffrey R. Strich, Richard T. Davey, Jr, Daniel S. Chertow.

480 **Supervision:** Peter D. Kwong, Daniel S. Chertow, Nancy J. Sullivan, Eli A. Boritz.

481 **Writing – original draft:** Sung Hee Ko, Elham Bayat Mokhtari, Prakriti Mudvari, Eli A. Boritz.

482 **Writing – review & editing:** Sung Hee Ko, Elham Bayat Mokhtari, Prakriti Mudvari,  
483 Christopher D. Stringham, Danielle Wagner, John Misasi, Nancy J. Sullivan, Eli A. Boritz.

484

485 **Declaration of Interests**

486 The authors declare no competing interests.

487

488 **Funding**

489 Funding was provided by the Intramural Research Program of the U.S. National Institutes of  
490 Health. M.J.R-B. is supported by NIGMS Postdoctoral Research Associate Training Program  
491 (1FI2GM137804-01).

492

493 **Data and materials availability**

494 Raw PacBio CCS sequence data associated with this study have been deposited in the NCBI  
495 SRA database with the BioProject accession number PRJNA680710. The bioinformatic pipeline  
496 for HT-SGS data analysis has been deposited (URL pending).

497 **Figure Legends**

498 **Fig 1. Overview of HT-SGS data generation and analysis.**

499 (A) SARS-CoV-2 genomic RNA (gRNA) is reverse-transcribed to include an 8-nucleotide  
500 unique molecular identifier (UMI; multicolored bar), followed by PCR amplification and Pacific  
501 Biosciences single-molecule, real-time (SMRT) sequencing of the 6.1-kilobase region  
502 encompassing spike (S), ORF3, envelope (E), and membrane (M) protein genes. After quality  
503 control and trimming, sequence reads are compiled into bins that share a UMI sequence, and bins  
504 with low read counts are removed according to the inflection point of the read count distribution  
505 (see S2B Fig). Presumptive false bins arising from errors in the UMI are then identified and  
506 removed by the network adjacency method, followed by further removal of bins with the lowest  
507 read counts using a more conservative knee point cutoff (see S2C Fig). Variant calling is then  
508 used to identify presumptive erroneous mutations based on rarity and pattern (ex., single-base  
509 insertions adjacent to homopolymers), and these are reverted to the sample consensus. Finally,  
510 SGS that correspond to haplotypes occurring only once in each sample are excluded (not  
511 pictured). (B) To validate data generation and analysis procedures, clonal RNAs transcribed *in*  
512 *vitro* from USA/WA-1 and double mutant sequences were mixed at varying ratios and subjected  
513 to HT-SGS. Results are described in Results and Table I.

514

515 **Fig 2. Analysis of SARS-CoV-2 genetic diversity *in vitro*.**

516 (A) Haplotype diagrams (left) depicting SARS-CoV-2 SGS detected in a 4<sup>th</sup>-passage Vero cell  
517 culture of the WA-1 reference clinical isolate. Spike NH<sub>2</sub>-terminal domain (NTD), receptor-  
518 binding domain (RBD), and furin cleavage site (F) regions are shaded grey, with remaining  
519 regions of spike in white. Pink tick marks illustrate mutations relative to the sample consensus

520 sequence. Amino acid changes corresponding to these mutations are shown in sequence  
521 alignment form (middle), with the percentage of all SGS in the sample matching each haplotype  
522 shown in the bar graph (right). The grey bar in the graph indicates the haplotype that matches the  
523 sample consensus sequence; variant haplotypes with at least 1 mismatch to sample consensus are  
524 in pink. (B) Read counts of each UMI bin for which the SARS-CoV-2 sequence matched each of  
525 18 different haplotypes in Vero cell culture of the WA-1 clinical isolate. Bars indicate median  
526 read counts among bins. (C) Mapping of detected spike gene mutations on the trimer structure.  
527 Two protomers of the SARS-CoV-2 spike (PDB ID: 6zge) are shown in surface representation  
528 and colored light blue and wheat, respectively. The third protomer is shown in cartoon  
529 representation with the NTD region colored in bright green. NTD mutations as well as T307I and  
530 H655Y are shown in red and the furin cleavage site mutations are in brown. The molecular  
531 structures were prepared with PyMOL (<https://pymol.org>).

532

533 **Fig 3. Variant haplotypes of the SARS-CoV-2 virion surface protein gene region detected in**  
534 **upper respiratory tract samples from 7 hospitalized study participants with COVID-19.**

535 Each participant label indicates day of clinical illness and the number of SGS obtained for the  
536 sample in parentheses. Haplotype diagrams (left) depicting SARS-CoV-2 SGS are as in Fig 2.  
537 Non-synonymous or synonymous mutations in each haplotype relative to the WA-1 reference  
538 sequence are shown with pink or blue tick marks. Amino acid changes (middle) and percentages  
539 of all SGS in the sample attributable to indicated haplotypes (right) are as in Fig 2. The  
540 haplotype matching the consensus for each sample is represented in grey; variant haplotypes  
541 with at least 1 non-synonymous mismatch to sample consensus are in pink.

542

543 **Fig 4. Longitudinal analysis of participants 1 and 3 serum reactivity to binding domains of**  
544 **SARS-CoV-2 spike (S-2P).**

545 (A and B) Reactivity to each domain was determined by preincubation of S-2P with competing  
546 mAbs targeting that domain before measuring serum binding using BLI. Total bar height  
547 indicates the binding response without competition and is reported at saturating timepoint.  
548 Stacked bars indicate proportions of binding attributable to S2 (dark blue), RBD (purple), and  
549 NTD (blue) regions, as inferred from relative reduction in total binding produced by mAb  
550 competition. Undefined (grey) stacked bars indicate proportions of total binding not competed by  
551 any mAb panel used. Plotted results represent averages of 2-4 replicate experiments for each  
552 condition.

553

554 **Fig 5. Longitudinal analysis of SARS-CoV-2 RNA burden, SGS, and epitope-specific**  
555 **antibody binding to spike in participant 1.**

556 (A) Copy numbers of SARS-CoV-2 N1 (black squares) and N2 (grey circles) RNA (left y-axis)  
557 and percentage of SGS not matching the predominant/consensus haplotype (pink diamonds, right  
558 y-axis) plotted for upper respiratory tract samples from days 9-17. (B) Variant haplotypes of the  
559 SARS-CoV-2 virion surface protein gene region detected on days 9, 11, 13, 15, and 17. The  
560 number of SGS obtained at each day is in parentheses. Haplotype diagrams (left), amino acid  
561 changes (middle), and percentages of all SGS in the sample attributable to indicated haplotypes  
562 (right) are as in Fig 2 and 3. The haplotype matching the consensus for each sample is  
563 represented in grey; variant haplotypes with at least 1 non-synonymous mismatch to sample  
564 consensus are in pink; one variant haplotype differing from sample consensus by only a  
565 synonymous mismatch is in blue. (C) Mapping of detected spike gene mutations on the trimer

566 structure, viewed from the side (left) and top (right). The protomers in the spike (PDB ID: 6zge)  
567 were shown and colored with the same scheme as in Fig 2C. Detected mutations are highlighted  
568 in red. Antibody 4A8 (PDB ID: 7c21) is shown to bind to NTD with its epitope (blue)  
569 overlapping with the detected NTD mutations (right). The molecular structures were prepared  
570 with PyMOL (<https://pymol.org>). (D) Relative contribution of NTD epitope-specific serum  
571 antibodies to total NTD domain-specific binding on days 9, 12, 16, and 19. Plotted results  
572 represent averages of 2-4 replicate experiments for each condition.

573 **Supplemental Figure Legends**

574 **S1 Fig. Details of HT-SGS process from sample to sequencing.**

575 SARS-CoV-2 genomic RNA (gRNA) is reverse-transcribed with a primer that binds in ORF6,  
576 downstream of the M gene stop codon, and includes a UMI sequence of 8 random nucleotides  
577 flanked by a PCR reverse primer binding site. Reverse-transcription products are amplified by  
578 PCR using a forward primer that binds in ORF1, upstream of the spike gene start codon.  
579 Amplified products are then subjected to long-read sequencing.

580

581 **S2 Fig. Details of HT-SGS data analysis.**

582 (A) Bioinformatic pipeline, depicting sequential workflow steps and tools used. Black boxes  
583 show tasks at each step, with the tools used in the grey boxes, and the outputs in the blue bubbles.  
584 (B) Initial exclusion of false UMI bins based on read count distribution on a log scale. The  
585 dashed line indicates the read count inflection point below which UMI bins in this sample were  
586 excluded. (C) Final exclusion of low count UMI bins based on read count distribution on a log  
587 scale. The dashed line indicates the read count knee point below which UMI bins in this sample  
588 were excluded, following initial false bin removal from the sample and network adjacency. Data  
589 are presented for the cultured virus sample presented in Fig 2.

590

591 **S3 Fig. Relationships between inputs and yields of steps in the HT-SGS data generation**  
592 **process.**

593 (A) Comparison of virus load of original sample with total cDNA synthesis yield. (B)  
594 Comparison of cDNA input copies from each sample with final SGS counts.

595

596 **S4 Fig. Effect of downsampling on haplotype detection.**

597 Each subsample was generated by random draws of a fixed percentage from reads without  
598 replacement. This process was repeated 100 times for each percentage. (A) The initial numbers  
599 of UMI bins (y-axis) are shown for different degrees of downsampling (x-axis). (B) The  
600 minimum read counts per UMI bin (y-axis) are shown for different degrees of downsampling (x-  
601 axis). (C) Proportion of each haplotype present in the 100% sample and in each subsample. Data  
602 analyzed are from sequencing of participant 1, day 15.

603

604 **S1 Table. Clinical characteristics of study participants.**

605

606 **S2 Table. Primer sequences used in HT-SGS procedures for this study.**

607



## 608 **References**

- 609 1. Dearlove B, Lewitus E, Bai H, Li Y, Reeves DB, Joyce MG, et al. A SARS-CoV-2  
610 vaccine candidate would likely match all currently circulating variants. *Proc Natl Acad Sci U S*  
611 *A*. 2020;117(38):23652-62.
- 612 2. Cheng HY, Jian SW, Liu DP, Ng TC, Huang WT, Lin HH, et al. Contact Tracing  
613 Assessment of COVID-19 Transmission Dynamics in Taiwan and Risk at Different Exposure  
614 Periods Before and After Symptom Onset. *JAMA Intern Med*. 2020;180(9):1156-63.
- 615 3. To KK-W, Tsang OT-Y, Leung W-S, Tam AR, Wu T-C, Lung DC, et al. Temporal  
616 profiles of viral load in posterior oropharyngeal saliva samples and serum antibody responses  
617 during infection by SARS-CoV-2: an observational cohort study. *The Lancet Infectious*  
618 *Diseases*. 2020;20(5):565-74.
- 619 4. Zou L, Ruan F, Huang M, Liang L, Huang H, Hong Z, et al. SARS-CoV-2 Viral Load in  
620 Upper Respiratory Specimens of Infected Patients. *N Engl J Med*. 2020;382(12):1177-9.
- 621 5. Avanzato VA, Matson MJ, Seifert SN, Pryce R, Williamson BN, Anzick SL, et al. Case  
622 Study: Prolonged Infectious SARS-CoV-2 Shedding from an Asymptomatic  
623 Immunocompromised Individual with Cancer. *Cell*. 2020;183(7):1901-12 e9.
- 624 6. Choi B, Choudhary MC, Regan J, Sparks JA, Padera RF, Qiu X, et al. Persistence and  
625 Evolution of SARS-CoV-2 in an Immunocompromised Host. *N Engl J Med*. 2020;383(23):2291-  
626 3.
- 627 7. Martinot M, Jary A, Fafi-Kremer S, Leducq V, Delagreverie H, Garnier M, et al.  
628 Remdesivir failure with SARS-CoV-2 RNA-dependent RNA-polymerase mutation in a B-cell  
629 immunodeficient patient with protracted Covid-19. *Clin Infect Dis*. 2020.
- 630 8. Kemp SA, Collier DA, Datir RP, Ferreira I, Gayed S, Jahun A, et al. SARS-CoV-2  
631 evolution during treatment of chronic infection. *Nature*. 2021.
- 632 9. McCarthy KR, Rennick LJ, Nambulli S, Robinson-McCarthy LR, Bain WG, Haidar G, et  
633 al. Recurrent deletions in the SARS-CoV-2 spike glycoprotein drive antibody escape. *Science*.  
634 2021.
- 635 10. Capobianchi MR, Rueca M, Messina F, Giombini E, Carletti F, Colavita F, et al.  
636 Molecular characterization of SARS-CoV-2 from the first case of COVID-19 in Italy. *Clin*  
637 *Microbiol Infect*. 2020;26(7):954-6.
- 638 11. Jary A, Leducq V, Malet I, Marot S, Klement-Frutos E, Teyssou E, et al. Evolution of  
639 viral quasispecies during SARS-CoV-2 infection. *Clin Microbiol Infect*. 2020;26(11):1560 e1-  
640 e4.
- 641 12. Karamitros T, Papadopoulou G, Bousali M, Mexias A, Tsiodras S, Mentis A. SARS-  
642 CoV-2 exhibits intra-host genomic plasticity and low-frequency polymorphic quasispecies. *J*  
643 *Clin Virol*. 2020;131:104585.
- 644 13. Wolfel R, Corman VM, Guggemos W, Seilmaier M, Zange S, Muller MA, et al.  
645 Virological assessment of hospitalized patients with COVID-2019. *Nature*. 2020;581(7809):465-  
646 9.
- 647 14. Popa A, Genger JW, Nicholson MD, Penz T, Schmid D, Aberle SW, et al. Genomic  
648 epidemiology of superspreading events in Austria reveals mutational dynamics and transmission  
649 properties of SARS-CoV-2. *Sci Transl Med*. 2020;12(573).
- 650 15. Al Khatib HA, Benslimane FM, Elbashir IE, Coyle PV, Al Maslamani MA, Al-Khal A,  
651 et al. Within-Host Diversity of SARS-CoV-2 in COVID-19 Patients With Variable Disease  
652 Severities. *Front Cell Infect Microbiol*. 2020;10:575613.

- 653 16. Seemann T, Lane CR, Sherry NL, Duchene S, Goncalves da Silva A, Caly L, et al.  
654 Tracking the COVID-19 pandemic in Australia using genomics. *Nat Commun.* 2020;11(1):4376.
- 655 17. Rose R, Nolan DJ, Moot S, Feehan A, Cross S, Garcia-Diaz J, et al. Intra-host site-  
656 specific polymorphisms of SARS-CoV-2 is consistent across multiple samples and  
657 methodologies. *medRxiv.* 2020:2020.04.24.20078691.
- 658 18. Keele BF, Giorgi EE, Salazar-Gonzalez JF, Decker JM, Pham KT, Salazar MG, et al.  
659 Identification and characterization of transmitted and early founder virus envelopes in primary  
660 HIV-1 infection. *Proc Natl Acad Sci U S A.* 2008;105(21):7552-7.
- 661 19. Palmer S, Kearney M, Maldarelli F, Halvas EK, Bixby CJ, Bazmi H, et al. Multiple,  
662 linked human immunodeficiency virus type 1 drug resistance mutations in treatment-experienced  
663 patients are missed by standard genotype analysis. *Journal of clinical microbiology.*  
664 2005;43(1):406-13.
- 665 20. Wenger AM, Peluso P, Rowell WJ, Chang PC, Hall RJ, Concepcion GT, et al. Accurate  
666 circular consensus long-read sequencing improves variant detection and assembly of a human  
667 genome. *Nat Biotechnol.* 2019;37(10):1155-62.
- 668 21. Chitray M, Kotecha A, Nsamba P, Ren J, Maree S, Ramulongo T, et al. Symmetrical  
669 arrangement of positively charged residues around the 5-fold axes of SAT type foot-and-mouth  
670 disease virus enhances cell culture of field viruses. *PLoS Pathog.* 2020;16(9):e1008828.
- 671 22. Mandl CW, Kroschewski H, Allison SL, Kofler R, Holzmann H, Meixner T, et al.  
672 Adaptation of tick-borne encephalitis virus to BHK-21 cells results in the formation of multiple  
673 heparan sulfate binding sites in the envelope protein and attenuation in vivo. *J Virol.*  
674 2001;75(12):5627-37.
- 675 23. Liu Z, Zheng H, Lin H, Li M, Yuan R, Peng J, et al. Identification of Common Deletions  
676 in the Spike Protein of Severe Acute Respiratory Syndrome Coronavirus 2. *J Virol.* 2020;94(17).
- 677 24. Chi X, Yan R, Zhang J, Zhang G, Zhang Y, Hao M, et al. A neutralizing human antibody  
678 binds to the N-terminal domain of the Spike protein of SARS-CoV-2. *Science.*  
679 2020;369(6504):650-5.
- 680 25. Chen P, Nirula A, Heller B, Gottlieb RL, Boscia J, Morris J, et al. SARS-CoV-2  
681 Neutralizing Antibody LY-CoV555 in Outpatients with Covid-19. *N Engl J Med.* 2020.
- 682 26. Zou L, Ruan F, Huang M, Liang L, Huang H, Hong Z, et al. SARS-CoV-2 Viral Load in  
683 Upper Respiratory Specimens of Infected Patients. *New England Journal of Medicine.*  
684 2020;382(12):1177-9.
- 685 27. Sabino EC, Buss LF, Carvalho MPS, Prete CA, Jr., Crispim MAE, Fraiji NA, et al.  
686 Resurgence of COVID-19 in Manaus, Brazil, despite high seroprevalence. *Lancet.*  
687 2021;397(10273):452-5.
- 688 28. Tegally H, Wilkinson E, Giovanetti M, Iranzadeh A, Fonseca V, Giandhari J, et al.  
689 Emergence and rapid spread of a new severe acute respiratory syndrome-related coronavirus 2  
690 (SARS-CoV-2) lineage with multiple spike mutations in South Africa. *medRxiv.*  
691 2020:2020.12.21.20248640.
- 692 29. Wang P, Liu L, Iketani S, Luo Y, Guo Y, Wang M, et al. Increased Resistance of SARS-  
693 CoV-2 Variants B.1.351 and B.1.1.7 to Antibody Neutralization. *bioRxiv.* 2021.
- 694 30. Wang Z, Schmidt F, Weisblum Y, Muecksch F, Barnes CO, Finkin S, et al. mRNA  
695 vaccine-elicited antibodies to SARS-CoV-2 and circulating variants. *Nature.* 2021.
- 696 31. Chen J, Qi T, Liu L, Ling Y, Qian Z, Li T, et al. Clinical progression of patients with  
697 COVID-19 in Shanghai, China. *J Infect.* 2020;80(5):e1-e6.

- 698 32. Liu Y, Yan L-M, Wan L, Xiang T-X, Le A, Liu J-M, et al. Viral dynamics in mild and  
699 severe cases of COVID-19. *The Lancet Infectious Diseases*. 2020;20(6):656-7.
- 700 33. Zhou F, Yu T, Du R, Fan G, Liu Y, Liu Z, et al. Clinical course and risk factors for  
701 mortality of adult inpatients with COVID-19 in Wuhan, China: a retrospective cohort study. *The*  
702 *Lancet*. 2020;395(10229):1054-62.
- 703 34. Krieg PA. Improved synthesis of full-length RNA probe at reduced incubation  
704 temperatures. *Nucleic Acids Res*. 1990;18:6463.
- 705 35. Yu F, Qiu T, Zeng Y, Wang Y, Zheng S, Chen X, et al. Comparative Evaluation of Three  
706 Preprocessing Methods for Extraction and Detection of Influenza A Virus Nucleic Acids from  
707 Sputum. *Front Med (Lausanne)*. 2018;5:56.
- 708 36. Boritz EA, Darko S, Swaszek L, Wolf G, Wells D, Wu X, et al. Multiple Origins of Virus  
709 Persistence during Natural Control of HIV Infection. *Cell*. 2016;166(4):1004-15.
- 710 37. Hepler NL, Brown M, Smith ML, Katzenstein D, Paxinos EE, Alexander D. An  
711 Improved Circular Consensus Algorithm with an Application to Detect HIV-1 Drug-Resistance  
712 Associated Mutations (DRAMs). *Conference on Advances in Genome Biology and Technology*.  
713 2016.
- 714 38. Edgar RC. Search and clustering orders of magnitude faster than BLAST. *Bioinformatics*.  
715 2010;26(19):2460-1.
- 716 39. Martin M. Cutadapt removes adapter sequences from high-throughput sequencing reads.  
717 *EMBnetjournal* 2011;17:10-2.
- 718 40. Smith T, Heger A, Sudbery I. UMI-tools: modeling sequencing errors in Unique  
719 Molecular Identifiers to improve quantification accuracy. *Genome Res*. 2017;27(3):491-9.
- 720 41. Fu GK, Hu J, Wang PH, Fodor SP. Counting individual DNA molecules by the stochastic  
721 attachment of diverse labels. *Proc Natl Acad Sci U S A*. 2011;108(22):9026-31.
- 722 42. Li H. Minimap2: pairwise alignment for nucleotide sequences. *Bioinformatics*.  
723 2018;34(18):3094-100.
- 724 43. Wrapp D, Wang N, Corbett KS, Goldsmith JA, Hsieh CL, Abiona O, et al. Cryo-EM  
725 structure of the 2019-nCoV spike in the prefusion conformation. *Science*. 2020;367(6483):1260-  
726 3.
- 727 44. Jones BE, Brown-Augsburger PL, Corbett KS, Westendorf K, Davies J, Cujec TP, et al.  
728 LY-CoV555, a rapidly isolated potent neutralizing antibody, provides protection in a non-human  
729 primate model of SARS-CoV-2 infection. *bioRxiv*. 2020.
- 730 45. Pinto D, Park YJ, Beltramello M, Walls AC, Tortorici MA, Bianchi S, et al. Cross-  
731 neutralization of SARS-CoV-2 by a human monoclonal SARS-CoV antibody. *Nature*.  
732 2020;583(7815):290-5.
- 733 46. Yuan M, Wu NC, Zhu X, Lee CD, So RTY, Lv H, et al. A highly conserved cryptic  
734 epitope in the receptor binding domains of SARS-CoV-2 and SARS-CoV. *Science*.  
735 2020;368(6491):630-3.
- 736 47. Shi R, Shan C, Duan X, Chen Z, Liu P, Song J, et al. A human neutralizing antibody  
737 targets the receptor-binding site of SARS-CoV-2. *Nature*. 2020;584(7819):120-4.
- 738 48. Zhou T, Teng IT, Olia AS, Cerutti G, Gorman J, Nazzari A, et al. Structure-Based Design  
739 with Tag-Based Purification and In-Process Biotinylation Enable Streamlined Development of  
740 SARS-CoV-2 Spike Molecular Probes. *Cell Rep*. 2020;33(4):108322.
- 741 49. Liu L, Wang P, Nair MS, Yu J, Rapp M, Wang Q, et al. Potent neutralizing antibodies  
742 against multiple epitopes on SARS-CoV-2 spike. *Nature*. 2020;584(7821):450-6.
- 743

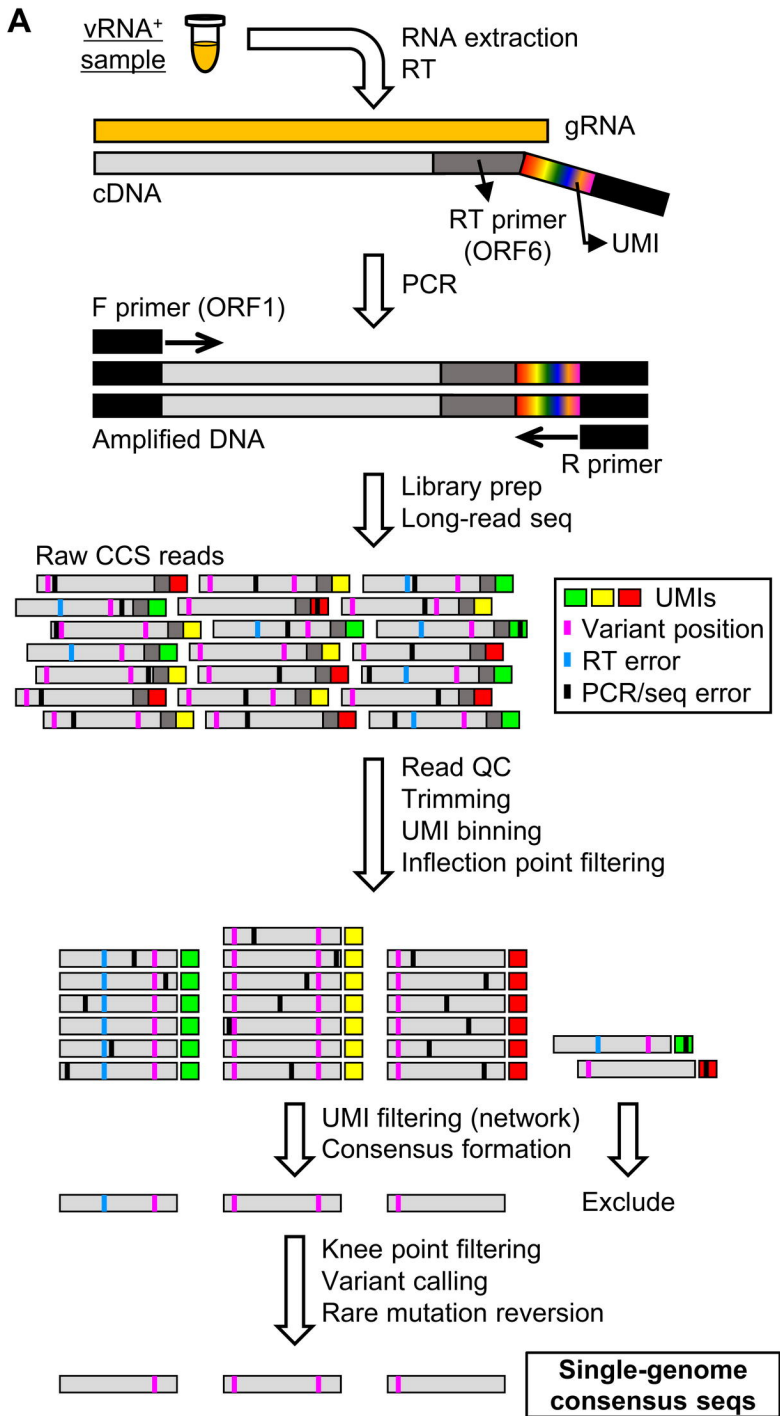

**B** Clonal RNA mixtures

 USA/WA-1 (wt)

 Double mut (2M)

1:1, 1:5, 5:1, 1:50, & 50:1

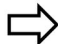

**HT-SGS Validation**

- Error rate/base
- Haplotype recovery
- Recombination

**A**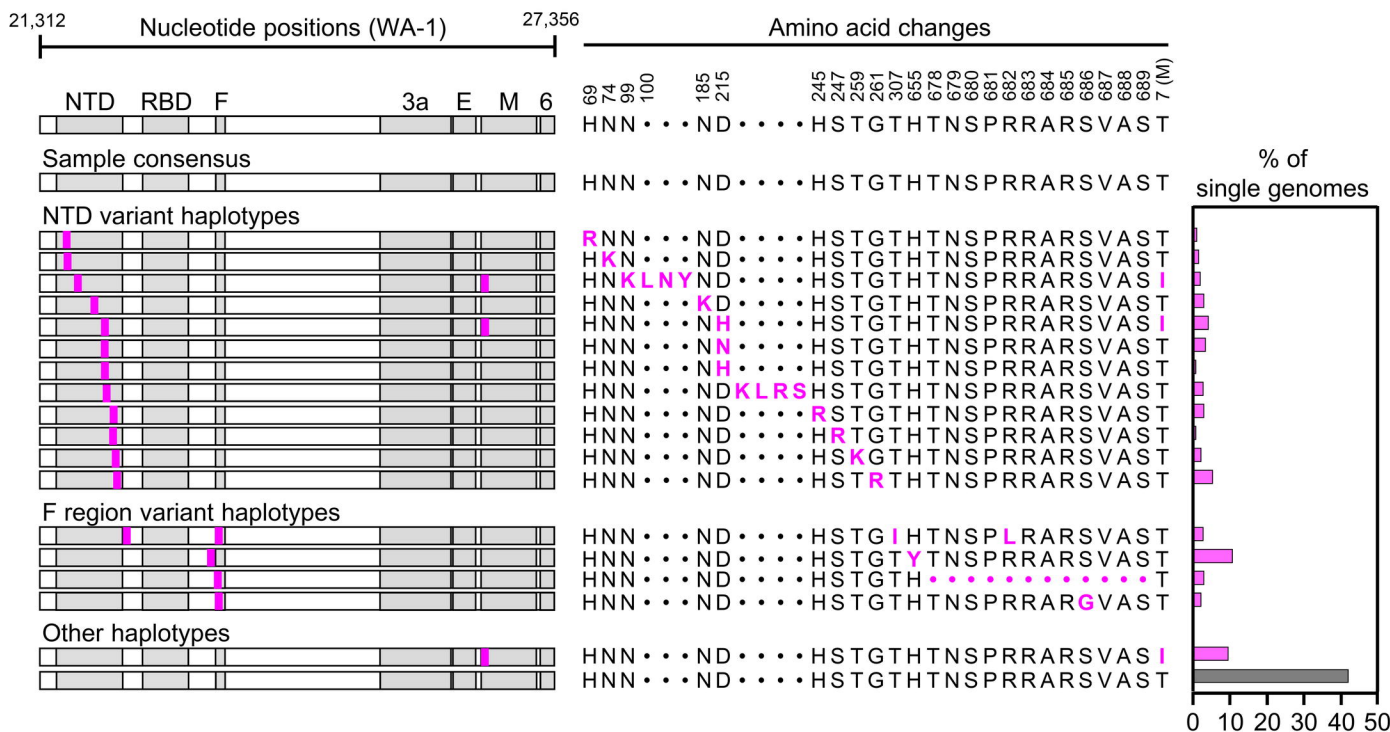**B**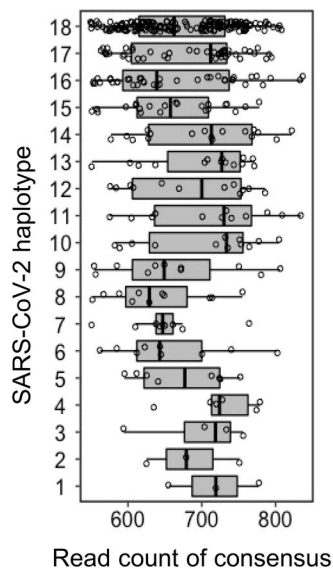**C**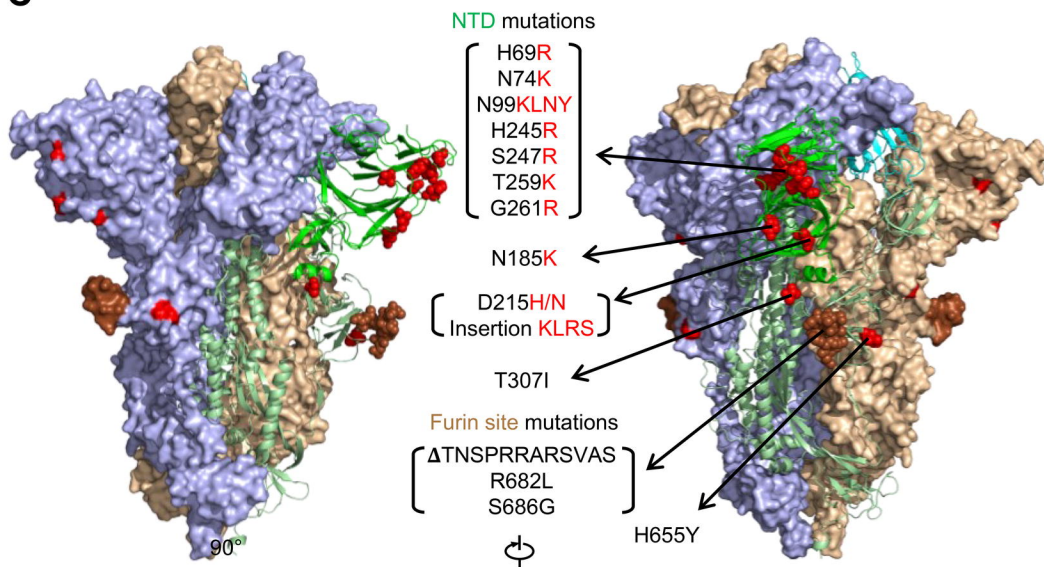

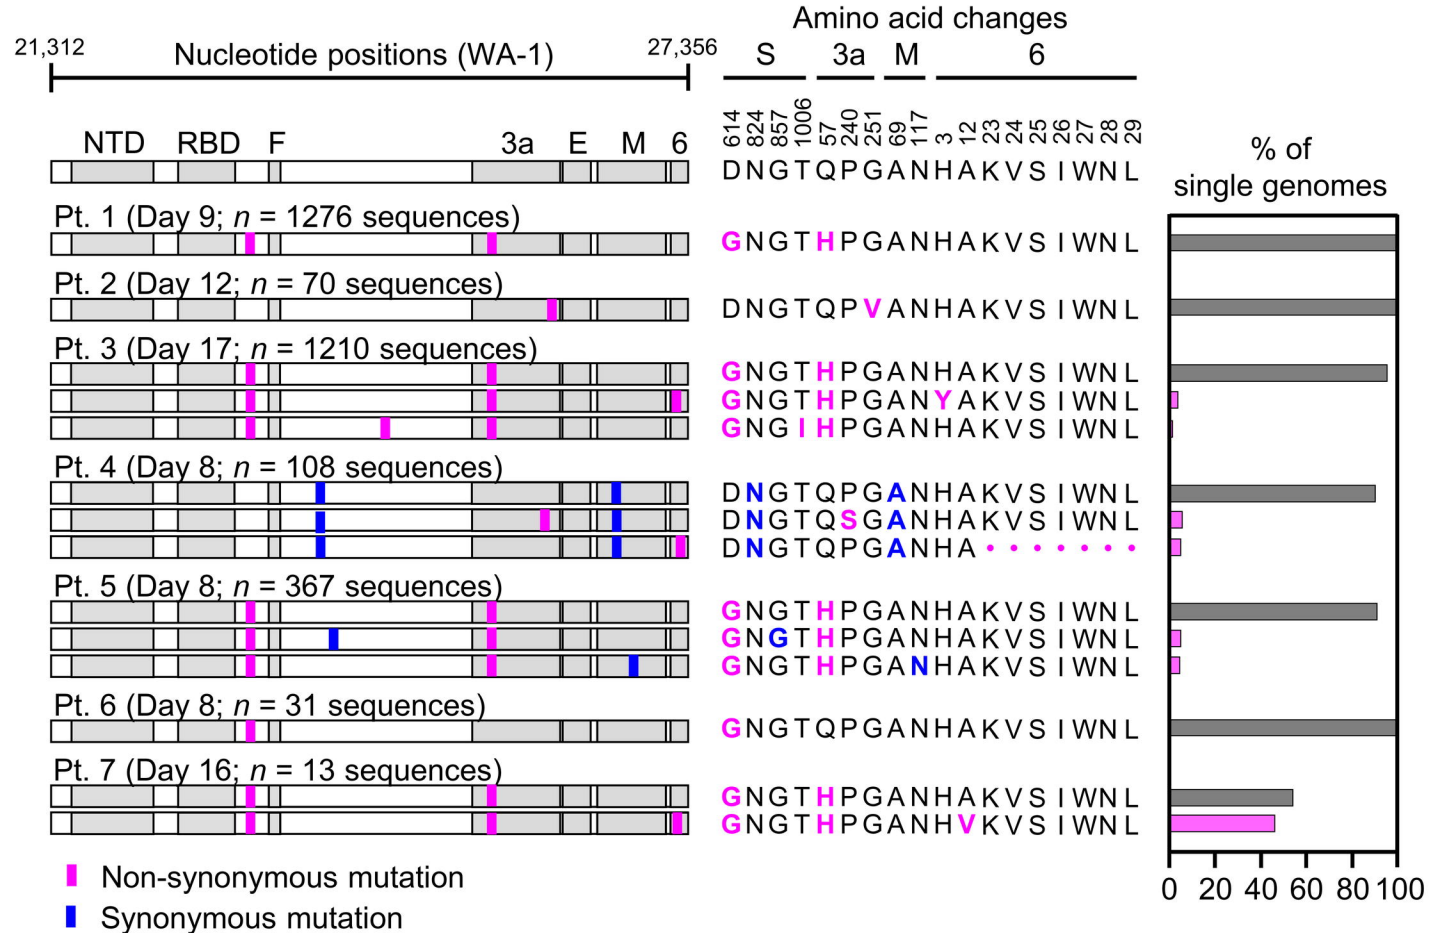

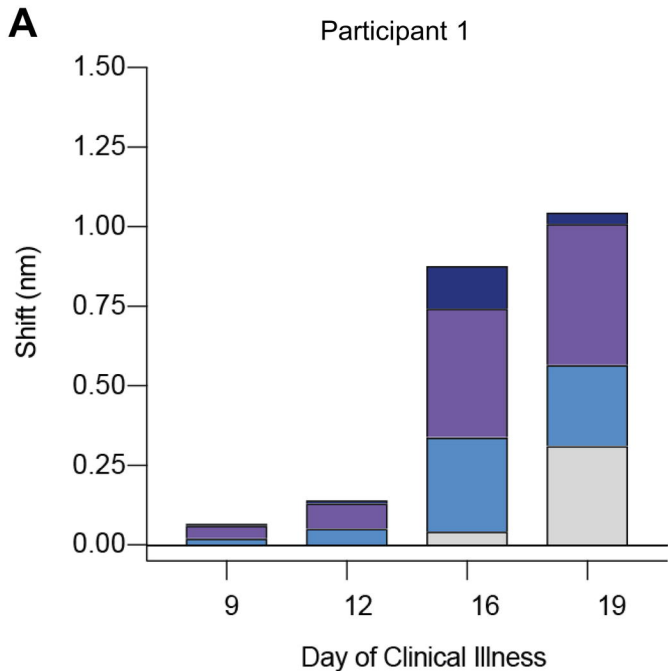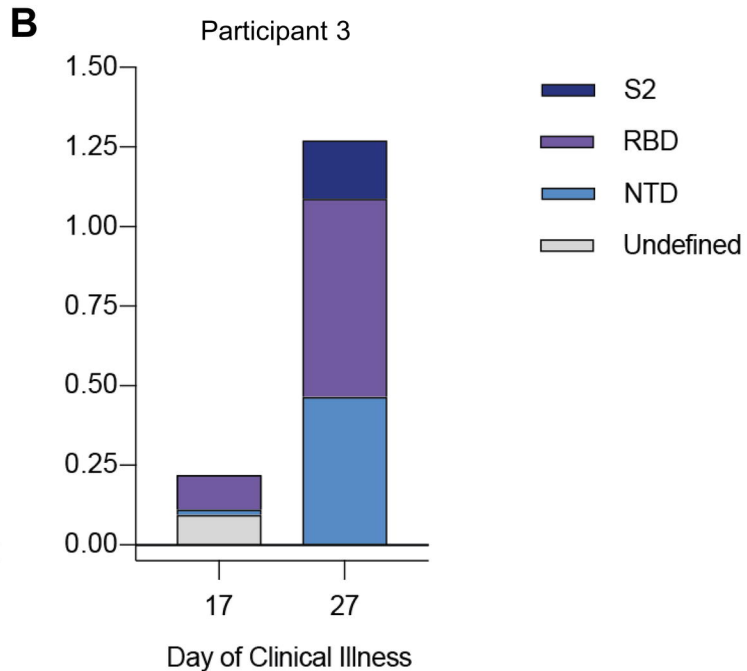

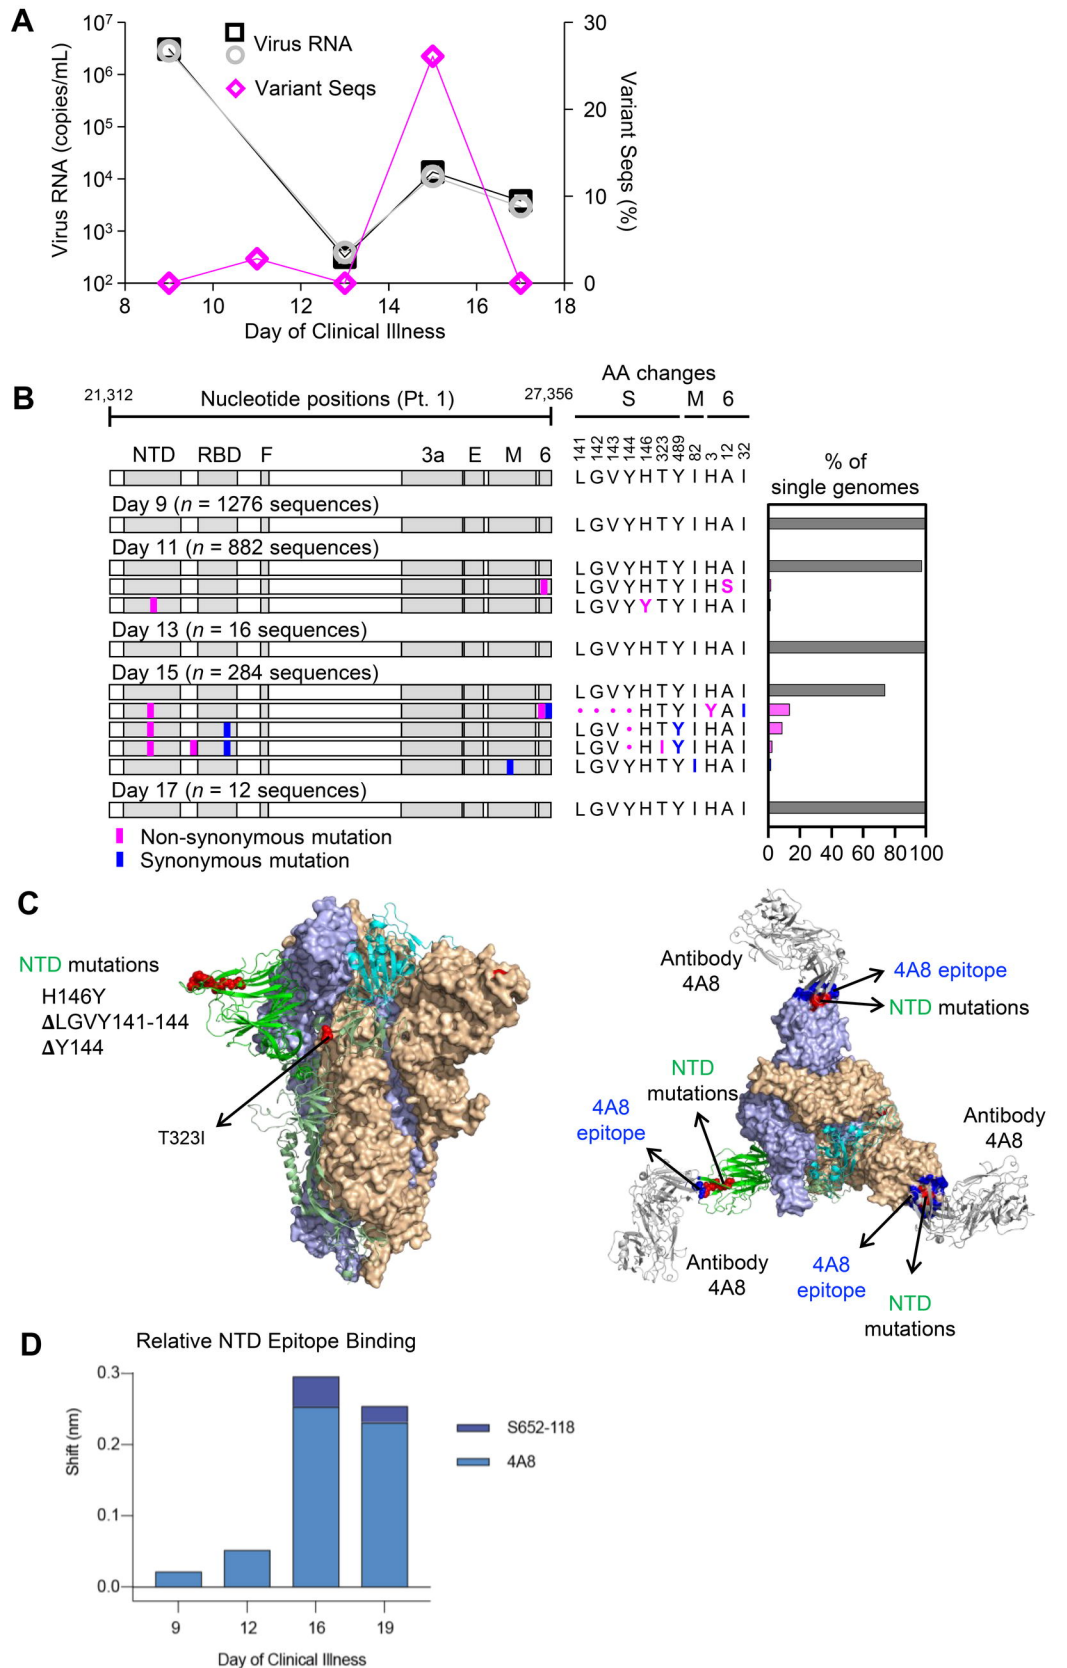

Source: https://www.biorxiv.org/content/10.1101/2021.02.21.432184v1.full.pdf
