# Supplementary material for: High-Throughput, Single-Copy Sequencing Reveals SARS-CoV-2 Spike Variants Coincident with Mounting Humoral Immunity during Acute COVID-19
Source: PubMed Central journal article supplement (PMC7924285; doi:10.1101/2021.02.21.432184), 2021-02-22

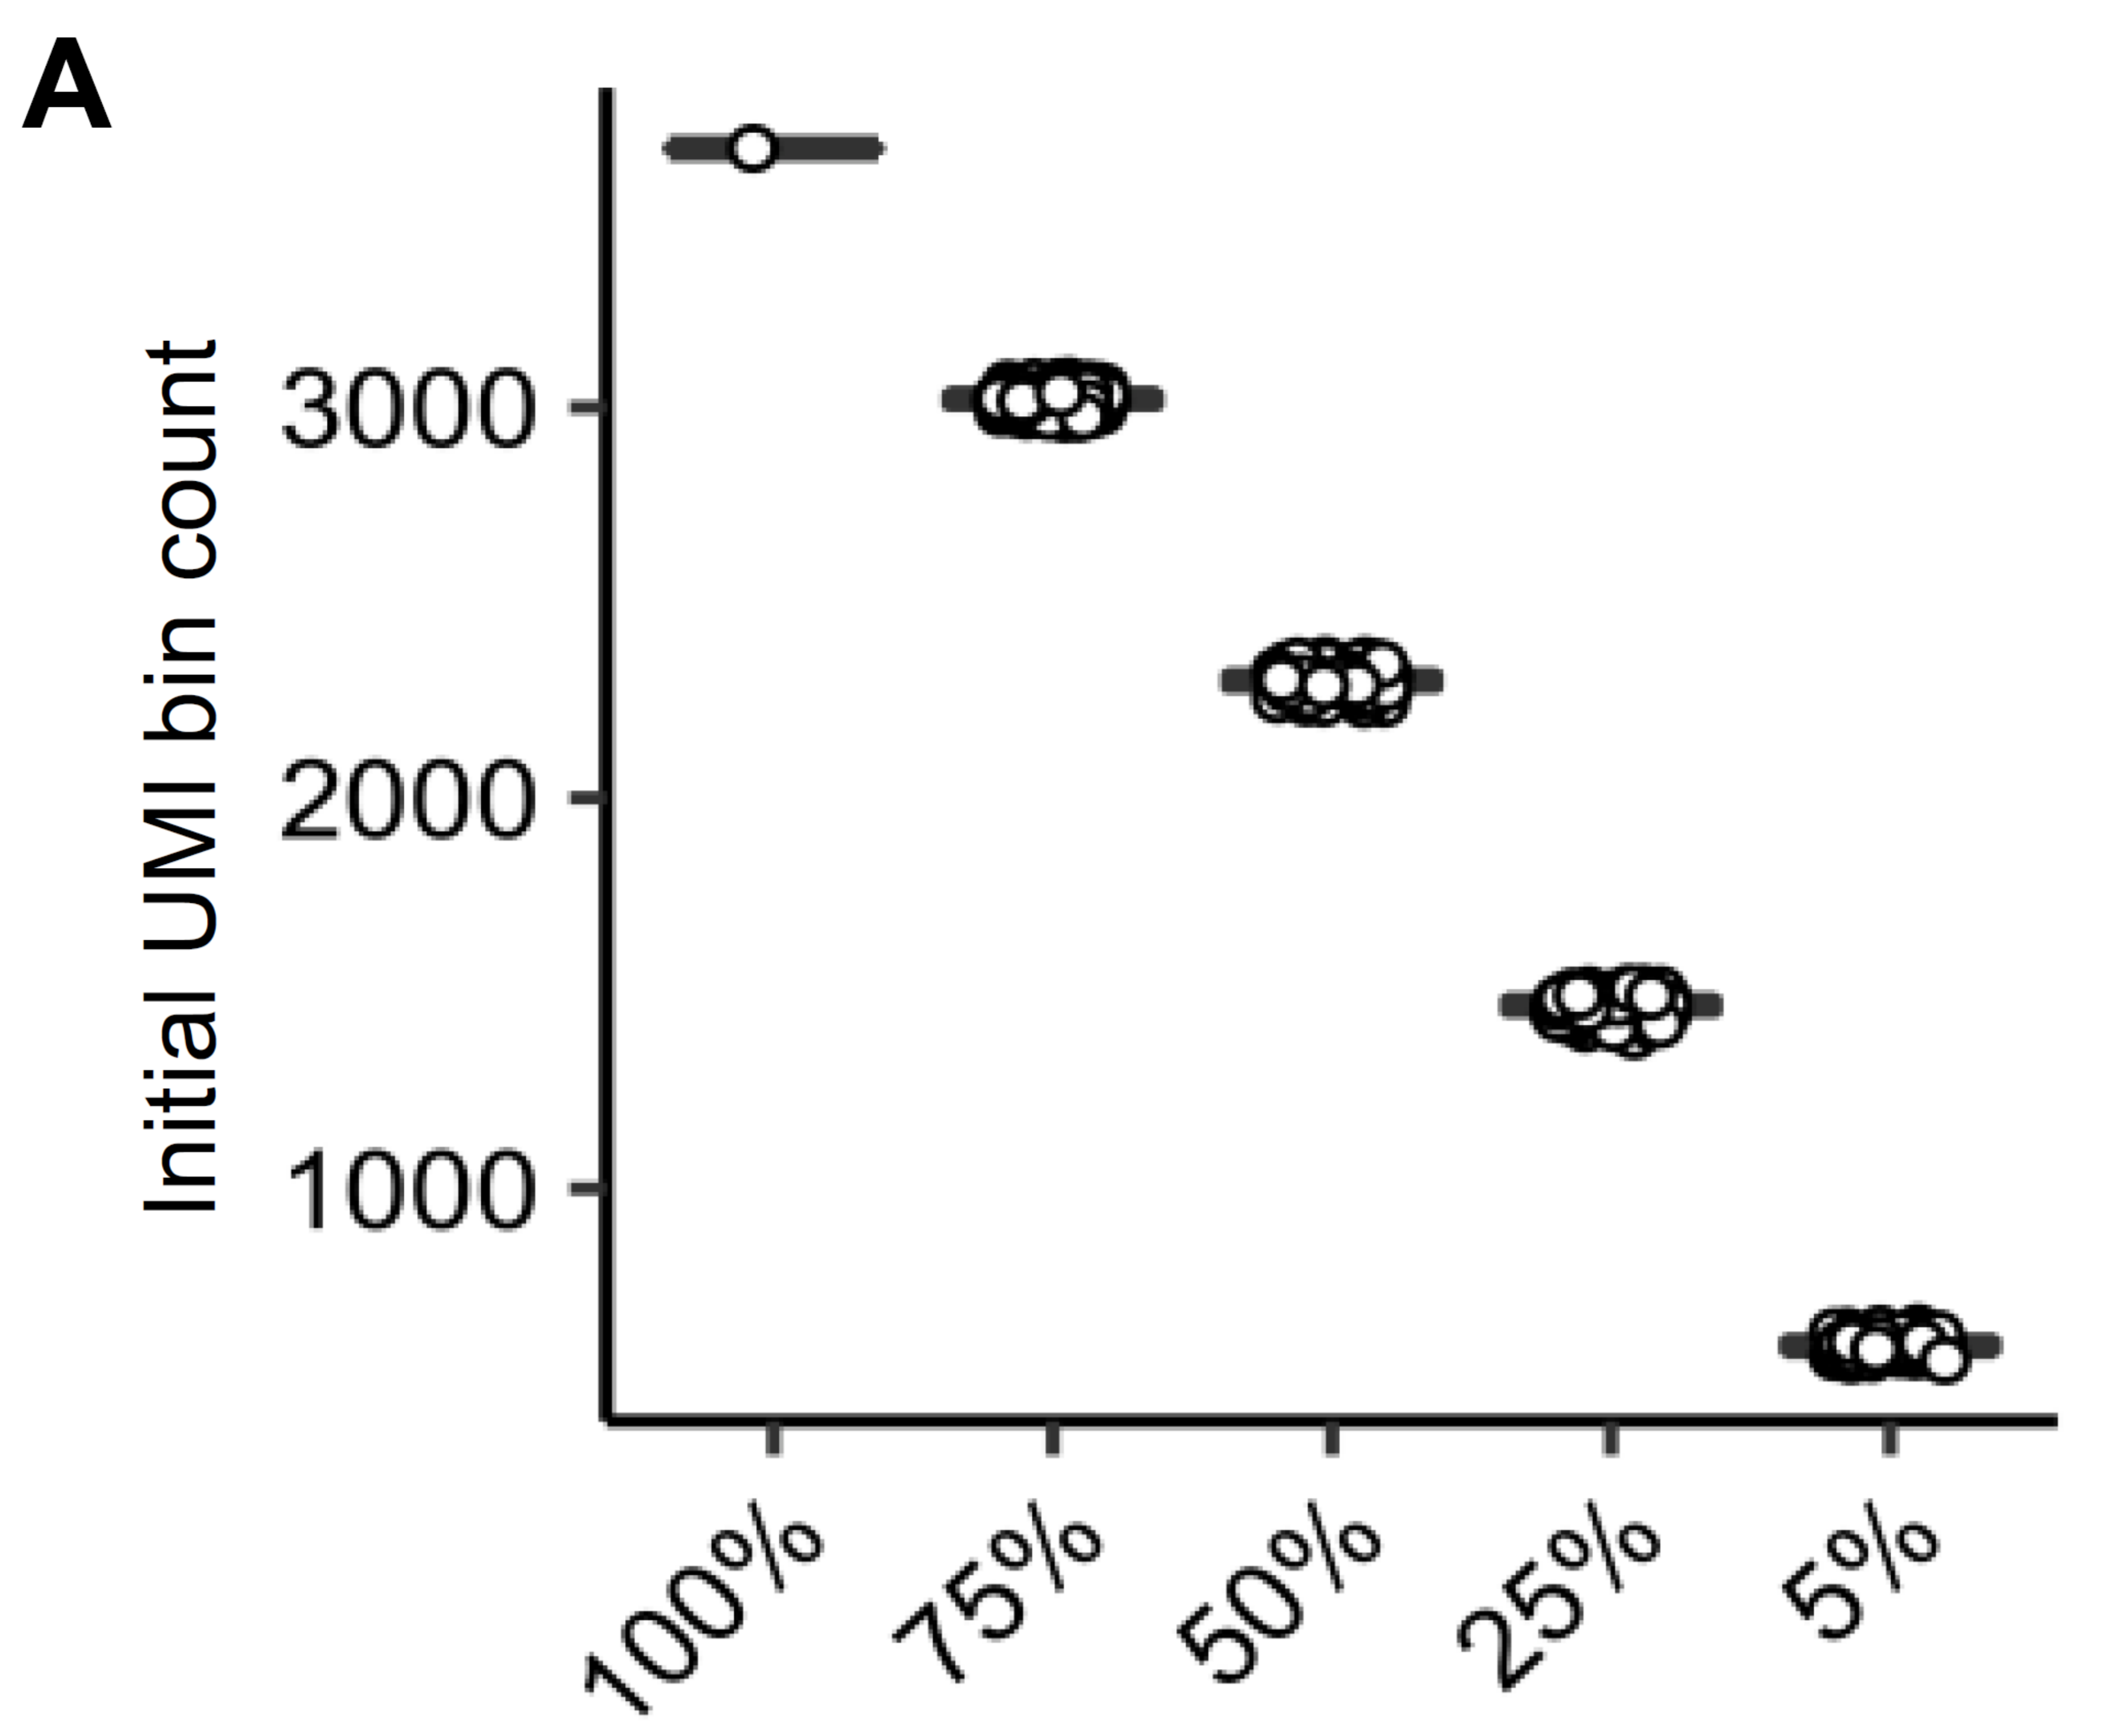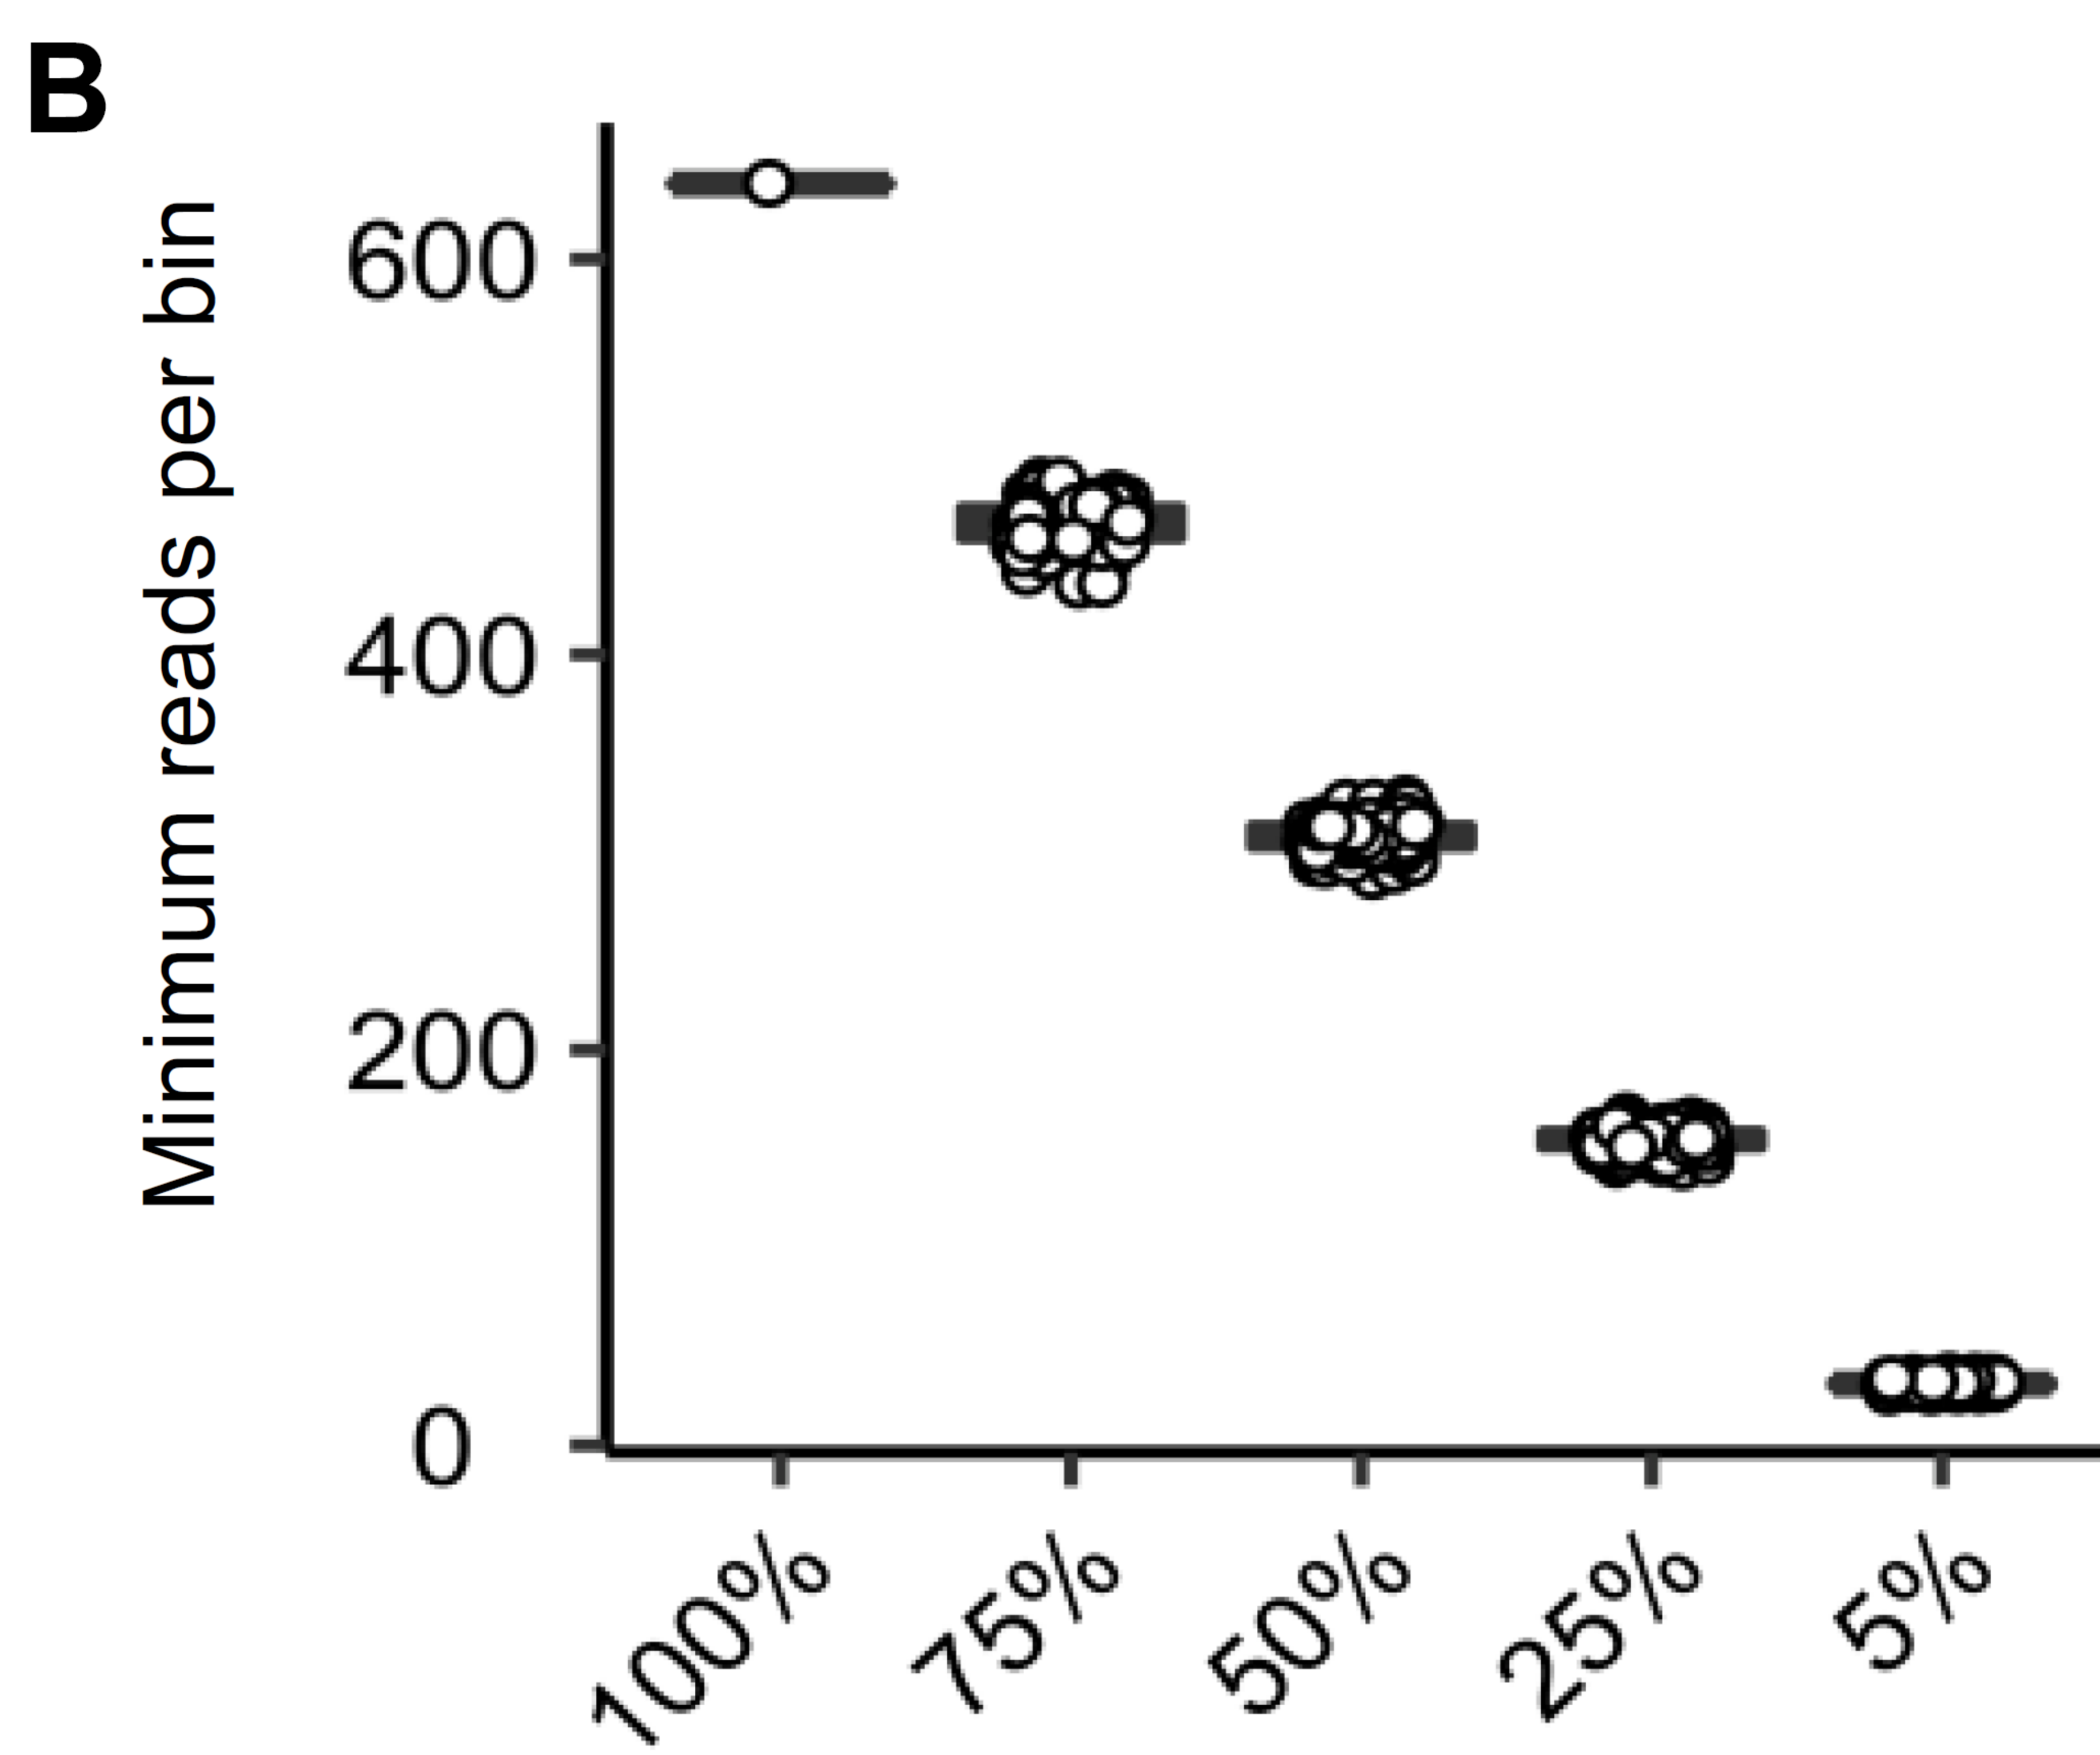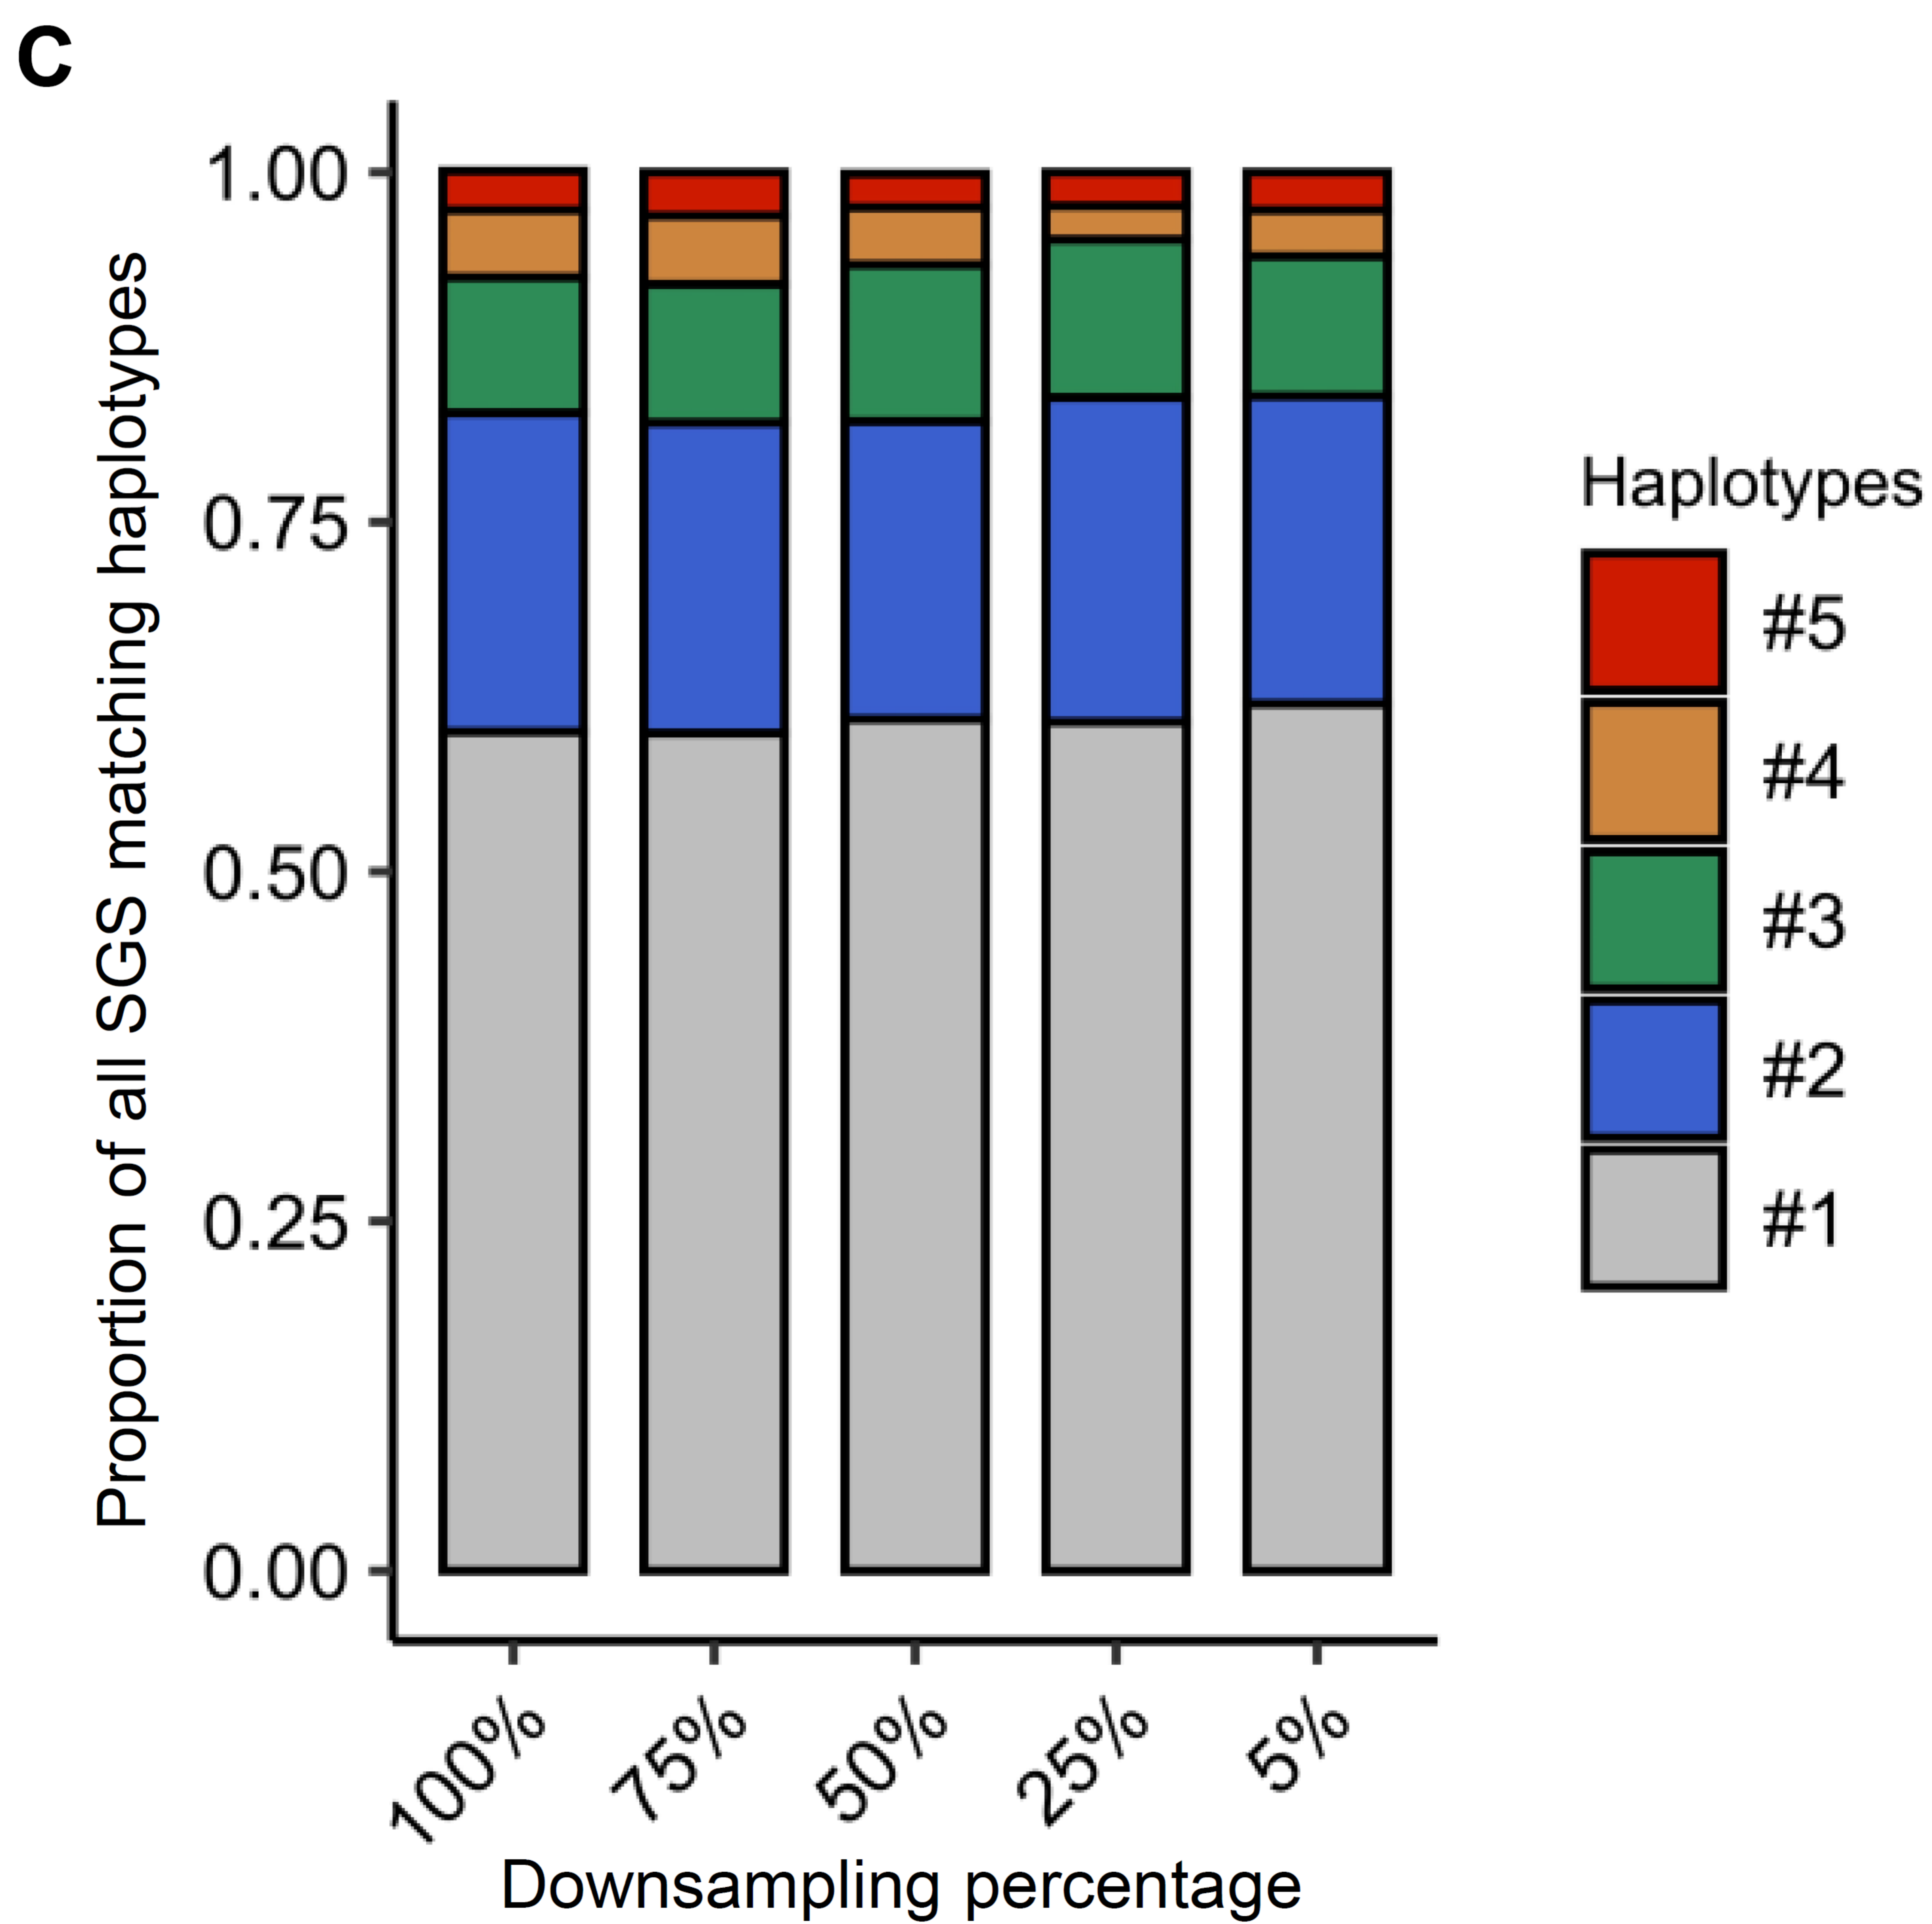

Supplement: media-6.pdf [file media-6.pdf]
